1 **Microbial competition reduces interaction distances to the low  $\mu\text{m}$ -range**

2

3 Rinke J. van Tatenhove-Pel<sup>a</sup>, Tomaž Rijavec<sup>b</sup>, Aleš Lapanje<sup>b</sup>, Iris van Swam<sup>a</sup>, Emile Zwering<sup>a</sup>,

4 Jhonatan A. Hernandez-Valdes<sup>c</sup>, Oscar P. Kuipers<sup>c</sup>, Cristian Picioreanu<sup>d</sup>, Bas Teusink<sup>a</sup>, Herwig

5 Bachmann<sup>a,e\*</sup>

6

7 <sup>a</sup>Systems Biology Lab, Amsterdam Institute for Molecules, Medicines and Systems, VU

8 University Amsterdam, de Boelelaan 1108, 1081HV Amsterdam, The Netherlands

9 <sup>b</sup>Department of Environmental Sciences, Jožef Stefan Institute, Jamova cesta 39, 1000

10 Ljubljana, Slovenia

11 <sup>c</sup> Department of Molecular Genetics, Groningen Biomolecular Sciences and Biotechnology

12 Institute, University of Groningen, Nijenborgh 7, 9747AG Groningen, The Netherlands

13 <sup>d</sup> Department of Biotechnology, Delft University of Technology, Van der Maasweg 9,

14 2629HZ, Delft, The Netherlands

15 <sup>e</sup> NIZO Food Research, Kernhemseweg 2, 6718ZB Ede, The Netherlands

16

17 \* Address correspondence to Herwig Bachmann, [h.bachmann@vu.nl](mailto:h.bachmann@vu.nl).

18 **Abstract**

19 Metabolic interactions between cells affect microbial community compositions and hence  
20 their function in ecosystems. It is well-known that under competition for the exchanged  
21 metabolite, concentration gradients constrain the distances over which interactions can occur.  
22 However, interaction distances are typically quantified in two-dimensional systems or  
23 without accounting for competition or other metabolite-removal, conditions which may not  
24 very often match natural ecosystems. We here analyze the impact of cell-to-cell distance on  
25 unidirectional cross-feeding in a three-dimensional system with competition for the  
26 exchanged metabolite. Effective interaction distances were computed with a reaction-  
27 diffusion model and experimentally verified by growing a synthetic consortium of 1  $\mu\text{m}$ -  
28 sized metabolite producer, receiver and competitor cells in different spatial structures. We  
29 show that receivers cannot interact with producers  $\sim 15 \mu\text{m}$  away from them, as product  
30 concentration gradients flatten close to producer cells. We developed an aggregation protocol  
31 and created variants of the receiver cells' import system, to show that within producer-  
32 receiver aggregates even low affinity receiver cells could interact with producers. These  
33 results show that competition or other metabolite-removal of a public good in a three-  
34 dimensional system reduces the interaction distance to the low micrometer-range,  
35 highlighting the importance of concentration gradients as physical constraint for cellular  
36 interactions.

## 37 **Introduction**

38 Microbial interactions are observed in dense biofilms (0  $\mu\text{m}$  between cells) as well as in  
39 oceans (>100  $\mu\text{m}$  between cells), demonstrating that cells interact at various distances [1–4].

40 These interactions influence the selection pressure within an environment, and therefore  
41 affect the structure and evolution of microbial communities [5]. As these communities play  
42 an important role in many ecosystems, from global biogeochemical fluxes [6] to human  
43 health [7], understanding and controlling these interactions is of high importance.

44

45 Metabolites or signaling molecules involved in interactions can be exchanged via contact-  
46 dependent and contact-independent transfer mechanisms. Contact-dependent mechanisms  
47 require short cell-to-cell distances and use for instance direct contact between cells, vesicle  
48 chains or nanotubes for exchange [5]. Contact-independent mechanisms require passive or  
49 active transport of the produced compound to the extracellular space, where it subsequently  
50 moves via diffusion and convection [5]. Contact-independent interactions can be local  
51 (mainly between neighboring cells) or global (within the whole population), depending on the  
52 profile of the concentration gradient. *Saccharomyces cerevisiae* for instance uses its  
53 extracellular enzyme invertase to split sucrose, resulting in a glucose and fructose gradient  
54 around the cell. At high sucrose concentrations both aggregated and single yeast cells can  
55 grow (global interactions), while at low sucrose concentrations only aggregated yeast cells  
56 grow (local interactions) [8]. A similar pattern is observed for the extracellular protease of  
57 *Lactococcus lactis*, which activity results in a peptide gradient around the cell. At high cell  
58 densities both protease positive and protease negative cells grow, while at low cell densities  
59 mainly protease positive cells grow, since only they can benefit from their produced peptides  
60 [9].

61

62 Whether contact-independent interactions are local or global depends on the distance between  
63 cells and the concentration gradient profile, which is affected by the metabolite source, the  
64 metabolite-sink and the diffusion and convection rate between them. The metabolite source  
65 can for instance be a producer cell [10], a nutrient pool in the environment [11] or an  
66 extracellular enzyme [8, 9]. The metabolite-sink can be a metabolite consuming cell [12, 13],  
67 a metabolite degrading enzyme [14] or the volume of the system, as dilution reduces the  
68 metabolite concentration [8, 9]. Although the exact nature of the source and sink are often  
69 only implicitly mentioned in these studies, their importance is well-known. Costly  
70 cooperative interactions are for instance more likely to evolve when cells are close to each  
71 other, because cooperators compete with wildtype non-cooperators for the excreted  
72 metabolite [5, 15, 16]. Selection for interactions is therefore often done by co-culturing cells  
73 on agar plates [17–19], and it is also described that interacting cells evolved aggregating  
74 phenotypes [20].

75

76 These examples show that in the presence of a metabolite-removing sink, concentration  
77 gradients constrain the distances over which interactions can occur. It is however not clear at  
78 what distances such interactions occur. Previous studies either quantified these distances in  
79 two-dimensional systems [11–13] or without a metabolite-removing sink [13, 14], while  
80 natural microbial communities reside in three-dimensional environments in which competing  
81 metabolite consumers and other types of metabolite-removing sinks are very likely to be  
82 present. We therefore combined computational and experimental analyses to provide a more  
83 systematic and quantitative perspective on the impact of cell-to-cell distance on metabolic  
84 interactions in three dimensions and in the presence of metabolite-removing sinks. The  
85 reaction-diffusion model and experimental results show that in these conditions receiver cells  
86 fixed at  $\sim 15 \mu\text{m}$  from glucose producing cells cannot interact with the producer cells, while

87 producer-receiver aggregation facilitates metabolic interactions even when receiver cells have  
88 a low affinity for the product caused by genetic variation of their glucose import systems.  
89 These results suggest that competition or other metabolite-removal in a three-dimensional  
90 system reduces interaction distances to well below 15  $\mu\text{m}$ .  
91

## 92 **Materials and methods**

### 93 **Strains and media**

94 All the strains that were used are listed in Table 1. *Lactococcus lactis* NZ9000 strains  
95 PTSman\_GFP, PTScel\_GFP, and glcU\_GFP were obtained by a single-crossover integration  
96 of vector pSEUDO::*Pusp45-gfp* [21] into the *pseudo* 10 locus on the chromosome of *L. lactis*  
97 NZ9000 $\Delta$ *ptcC* $\Delta$ *glcU*, NZ9000 $\Delta$ *ptnABCD* $\Delta$ *glcU*, and NZ9000 $\Delta$ *ptnABCD* $\Delta$ *ptcC* [22],  
98 respectively. Integration was performed as previously described [23]. Transformants were  
99 selected on M17-agar plates supplemented with glucose, sucrose and 5  $\mu$ g/mL erythromycin.

100

101 *L. lactis* was grown in chemically defined medium (CDM) described by Otto *et al.* [24], with  
102 the following changes: 0.6 g/L NH<sub>4</sub>-citrate, 2.5 mg/L biotin, 0.02 mg/L riboflavin and no  
103 folic acid. *L. lactis* NZ9000 Glc-Lac<sup>+</sup> was pre-cultured in CDM + 0.95 wt% lactose, *L. lactis*  
104 MG5267 in CDM + 0.5 wt% lactose and *L. lactis* MG1363 [25], *L. lactis* MG1363\_GFP, *L.*  
105 *lactis* NZ9000\_GFP\_PTSman, *L. lactis* NZ9000\_GFP\_glcU and *L. lactis*  
106 NZ9000\_GFP\_PTScel in CDM + 0.5 wt% glucose. Agarose beads contained CDM + 0.4  
107 wt% carbon source and were incubated surrounded by oil, or by CDM + 0.2 wt% carbon  
108 source. Mono-cultures were incubated with the same carbon source as their pre-culture, co-  
109 cultures were incubated in presence of lactose. Incubations were done at 30°C.

110

111 **Table 1. Bacterial strains and plasmids used in this study**

| <i>L. lactis</i> strain                                      | Description                                                                                                                                                                                                | Reference |
|--------------------------------------------------------------|------------------------------------------------------------------------------------------------------------------------------------------------------------------------------------------------------------|-----------|
| NZ9000 $\Delta$ <i>ptcC<math>\Delta</math><i>glcU</i></i>    | Derivative of NZ9000 containing a 1254 bp deletion in <i>ptcC</i> and a 864 bp deletion in <i>glcU</i> .                                                                                                   | [22]      |
| NZ9000 $\Delta$ <i>ptnABCD<math>\Delta</math><i>glcU</i></i> | Derivative of NZ9000 containing a 1736 bp deletion in <i>ptnABCD</i> and a 864 bp deletion in <i>glcU</i> .                                                                                                | [22]      |
| NZ9000 $\Delta$ <i>ptnABCD<math>\Delta</math><i>ptcC</i></i> | Derivative of NZ9000 containing a 1736 bp deletion in <i>ptnABCD</i> and a 1254 bp deletion in <i>ptcC</i> .                                                                                               | [22]      |
| MG5267                                                       | <i>L. lactis</i> MG1363 with the lactose operon integrated into the genome.                                                                                                                                | [26]      |
| NZ9000 Glc-Lac+                                              | NZ9000 $\Delta$ <i>glk</i> $\Delta$ <i>ptnABCD</i> containing a 657-bp deletion in <i>ptcBA</i> , carrying pMG8020 (lactose mini-plasmid of 23.7 kb, containing <i>lacFEGABCD</i> , derivative of pLP712). | [27]      |
| MG1363_GFP                                                   | MG1363 carrying pSEUDO:: <i>P<sub>usp45</sub>-gfp</i> .                                                                                                                                                    | [21]      |
| NZ9000_PTS <sub>man</sub> _GFP                               | Ery <sup>r</sup> , NZ9000 $\Delta$ <i>ptcC<math>\Delta</math><i>glcU</i> carrying pSEUDO::<i>P<sub>usp45</sub>-gfp</i>.</i>                                                                                | This work |
| NZ9000_PTS <sub>cel</sub> _GFP                               | Ery <sup>r</sup> , NZ9000 $\Delta$ <i>ptnABCD<math>\Delta</math><i>glcU</i> carrying pSEUDO::<i>P<sub>usp45</sub>-gfp</i>.</i>                                                                             | This work |
| NZ9000_glcU_GFP                                              | Ery <sup>r</sup> , NZ9000 $\Delta$ <i>ptnABCD<math>\Delta</math><i>ptcC</i> carrying pSEUDO::<i>P<sub>usp45</sub>-gfp</i>.</i>                                                                             | This work |
| Plasmids                                                     | Description                                                                                                                                                                                                | Reference |
| pSEUDO:: <i>P<sub>usp45</sub>-gfp</i>                        | Ery <sup>r</sup> , integration vector, pSEUDO:: <i>P<sub>usp45</sub>-sfgfp(Bs)</i> derivative, carrying the gene coding for the green fluorescent protein (Dasher-GFP).                                    | [21]      |

112

## 113 **Aggregation protocol**

114 Producer and receiver cell pre-cultures (10 mL) were washed three times with 0.9% sodium  
115 chloride. Receiver cells were resuspended in 2 mL 0.225% sodium chloride, producer cells  
116 were resuspended in 0.9% sodium chloride and diluted to an OD<sub>600</sub> of 1.1. Both were  
117 incubated in an ultrasonification bath (Branson 200 Ultrasonic cleaner, Branson Ultrasonics,  
118 Danbury, CT, USA) at 46 kHz for 3 minutes to ensure complete resuspension to single cells.  
119 The surface of (non-)producer cells was charged positively by electrostatic deposition of  
120 polyethyleneimine (PEI; Mr 600 000 - 1 000 000; ~50% in H<sub>2</sub>O; Sigma-Aldrich, Saint Louis,  
121 MO, USA) as follows. Sonicated producer cells were mixed with 0.25% PEI (hydrated, pH 7)  
122 in a 1:1 (v/v) ratio and incubated at room temperature for 5 minutes. After incubation cells  
123 were collected by centrifugation (900 g, 3 minutes) and washed by replacing the supernatant  
124 with 0.9% sodium chloride five times without resuspending the pellet. Washed cells were  
125 resuspended in 200 µL 0.9% sodium chloride and sonicated as described above. The surface  
126 of washed receiver cells was negatively charged and therefore not further modified [28]. Cell  
127 concentrations in the prepared producer and receiver suspensions were measured with flow  
128 cytometry (Accuri C6, BD Biosciences, San Jose, CA, USA).

129 Aggregates were formed electrostatically by mixing the positively charged producer cells  
130 with the negatively charged receiver cells, such that the oppositely charged cells stuck to each  
131 other. The suspension with negatively charged receiver cells was mixed using a T10 basic  
132 ULTRA TURRAX homogenizer with an S10N-5G dispersing element (IKA, Staufen,  
133 Germany) at 8000 rpm for 15-20 minutes. While mixing, the positively charged producer  
134 cells were added to the negatively charged receiver cells using a 1 mL syringe (Terumo,  
135 Tokyo, Japan), a Chemyx Fusion 200 syringe pump (125-400 µL/h, Chemyx Inc., Stafford,  
136 TX, USA) and polyethylene tubing (inner diameter 0.38 mm, BD, Franklin Lakes, NJ, USA).



137 The mixing time (15-20 minutes) and syringe pump flow rate (125-400  $\mu\text{L}/\text{h}$ ) were adjusted  
138 within the mentioned ranges such that the final aggregate percentage was  $\sim 3\%$ .

139

#### 140 **Agarose beads formation and analysis**

141 Agarose beads in oil were made by mixing a water and an oil phase. The oil phase contained  
142 Novec HFE 7500 fluorinated oil (3M, Maplewood, MN, USA) and 0.2% PicoSurf 1  
143 surfactant (Sphere Fluidics, Cambridge, UK). The water phase contained CDM, 1 wt%  
144 melted agarose with ultra-low gelling temperature (Type IX-A, A2576, Sigma-Aldrich, Saint  
145 Louis, MO, USA) and cells, and it was prepared as follows. Pre-cultures were washed with  
146 phosphate buffered saline (PBS) and the  $\text{OD}_{600}$  was measured to determine the cell  
147 concentration (assuming  $\text{OD } 1 = 10^9$  cells/mL). The total cell concentration in the aggregate  
148 suspension was determined using flow cytometry (Accuri C6). The producer cell or aggregate  
149 concentration in CDM with agarose was set to  $2.7 \cdot 10^6/\text{mL}$ , the receiver cell concentration to  
150  $8.9 \cdot 10^7$  cells/mL.

151 300  $\mu\text{L}$  water phase and 700  $\mu\text{L}$  oil phase were mixed using a T10 basic ULTRA TURRAX  
152 homogenizer with an S10N-5G dispersing element at 8000 rpm for 5 minutes. Emulsions  
153 were subsequently placed on ice for at least 20 minutes, to solidify the agarose beads. After  
154 solidification cells could not move and growth therefore resulted in micro-colony formation  
155 within the agarose bead. Formed agarose beads had an average diameter of 37  $\mu\text{m}$   
156 (supplementary information, section 1). Based on this average diameter, each bead contained  
157 on average 8 receiver cells. In addition to the receivers,  $\sim 2\%$  of the beads contained two or  
158 more producer cells/aggregates and  $\sim 19\%$  contained one producer cell/aggregate ( $\sim 79\%$   
159 contained no producer/aggregate).

160

161 To incubate agarose beads in CDM, 1 mL CDM and 1 mL perfluorooctanol (PFO, Alfa  
162 Aesar, Ward Hill, MA, USA) were added to the emulsion after solidification. This leads to  
163 the breaking of the emulsion and separation of the water and oil phase upon gently mixing.  
164 Subsequently the water phase, containing agarose beads in CDM, was separated from the oil  
165 phase and incubated while rotating. For incubation in presence of competing glucose-  
166 consumers  $10^9$  *L. lactis* MG1363 cells per mL were added to the CDM surrounding the  
167 agarose beads (supplementary information, section 2).

168

169 Growth in agarose beads was analyzed with flow cytometry (Accuri C6). Agarose beads in  
170 CDM were measured directly. For agarose beads in oil the emulsion was first broken by  
171 adding 240  $\mu$ L PBS and 300  $\mu$ L PFO to 60  $\mu$ L emulsion, followed by gently mixing. The  
172 water phase, containing agarose beads in PBS, was separated from the oil phase and  
173 measured using flow cytometry. Details about the flow cytometry gating strategy and data  
174 analysis are shown in supplementary information section 3.

175

### 176 **Three-dimensional reaction-diffusion model**

177 A three-dimensional, numerical reaction-diffusion model was implemented in COMSOL  
178 Multiphysics (COMSOL 5.0, Comsol Inc., Burlington, MA, USA). Two spherical agarose  
179 beads were placed in a cubic computational domain. One bead contained a producer cell that  
180 secreted glucose with a constant rate, and both beads contained eight receiver cells that  
181 consumed glucose based on Monod (saturation) kinetics. The concentration at the agarose  
182 bead surface resulted from a partition coefficient which was set to 0 to model incubation in  
183 oil, and to 1 to model incubation in CDM. The diffusion coefficient of glucose was set to  
184  $6.7 \cdot 10^{-10}$   $\text{m}^2/\text{s}$  [29] both inside and outside agarose beads [30], and 10 times lower in micro-  
185 colonies [29, 31]. A time-dependent study yielded the spatial distribution of glucose. See

186 supplementary information section 4 for more details about the geometry and used  
187 parameters.

188 **Results**

189 **Reaction-diffusion modelling predicts short interaction distances in three-dimensional**  
190 **systems**

191 To compare concentration gradients in two- and three-dimensional systems we made  
192 reaction-diffusion models in COMSOL Multiphysics (supplementary information, section  
193 4.2). The concentration gradients around a producer cell were calculated either in cube to  
194 mimic a three-dimensional system, or in a thin plate to mimic a two-dimensional system  
195 (plate thickness of 1.1  $\mu\text{m}$ , roughly matching the producer cell diameter of 1  $\mu\text{m}$ ). In both  
196 cases the total volume was 1 nL ( $10^6$  cells/mL). The model predicted that in the thin plate the  
197 maximal concentration is halved at 24  $\mu\text{m}$  from the producer cell, while in the cube this  
198 distance is 0.6  $\mu\text{m}$  (Figure S5). This indicated that in three-dimensional systems the distances  
199 at which cells can interact are significantly shorter than in two-dimensional systems.

200

201 **Design of a synthetic consortium and three-dimensional spatial structure for growth**

202 To study how concentration gradients constrain interactions between micro-organisms in a  
203 three-dimensional environment, we extended the cubic model to contain producer and  
204 receiver cells, and analyzed the impact of cell-to-cell distance on the interaction  
205 (supplementary information, section 4.3). To experimentally validate the model results we  
206 constructed synthetic consortia using four *L. lactis* strains. 1) A “producer” that takes up  
207 lactose and hydrolyzes it intracellularly to glucose and galactose. It was engineered to not  
208 metabolize glucose, which was therefore secreted while the cells grew on galactose. 2) A  
209 GFP-expressing “receiver” that can take up and grow on glucose, but not lactose. 3) A “non-  
210 producer” that takes up lactose. It uses both the glucose and galactose moiety for growth, and  
211 therefore does not secrete glucose. 4) A “competing glucose-consumer” (Figure 1A). To co-  
212 culture these cells in a three-dimensional system, glucose-producers and -receivers (the

213 unidirectional cross-feeders) were encapsulated in solidified agarose beads with an average  
214 diameter of ~40  $\mu\text{m}$ . For negative controls, glucose-producers were replaced by glucose-  
215 “non-producers”. Cells were embedded in the beads either as separate cells (~15  $\mu\text{m}$  between  
216 cells) or as aggregates (0  $\mu\text{m}$  between cells) (Figure 1B). During incubation agarose beads  
217 were separated either by oil or by CDM (Figure 1C). Separation by oil prevented diffusion of  
218 glucose from beads, enabling us to validate that cells can grow and interact in agarose beads.  
219 Separation by CDM resulted in glucose diffusion from beads, enabling us to study  
220 unidirectional cross-feeding in presence of a concentration gradient in a three-dimensional  
221 system. To investigate the effect of metabolite-removal on the interaction distances,  
222 interactions were analyzed in presence and absence of competing glucose-consumers outside  
223 the beads (Figure 1C).  
224

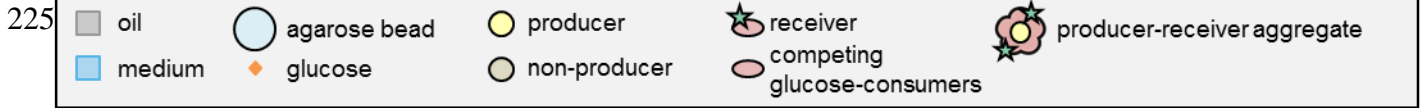

### A. Synthetic consortium

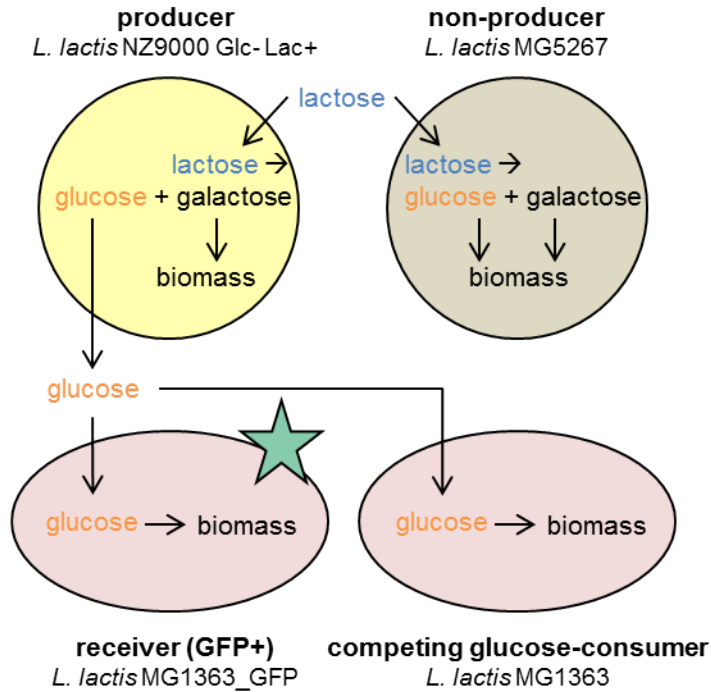

### B. Spatial structure within beads

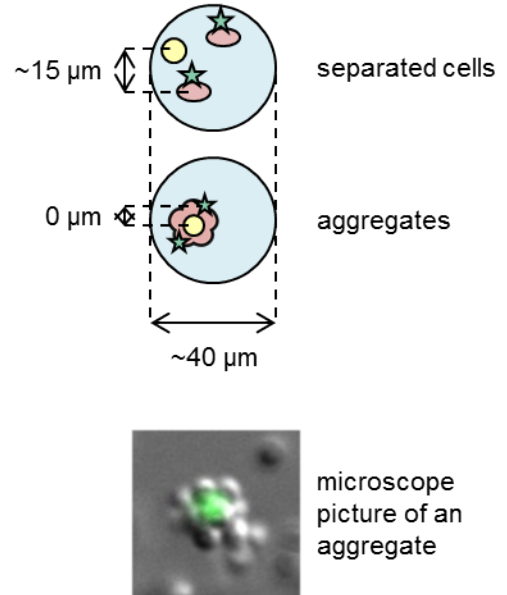

### C. Spatial structure between beads

agarose beads surrounded by oil  
no diffusion from beads

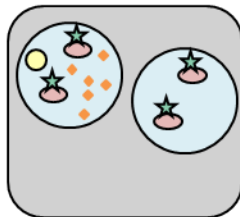

agarose beads surrounded by CDM  
diffusion from beads

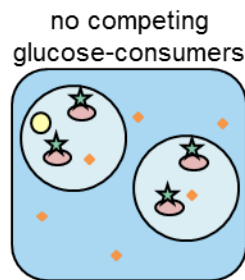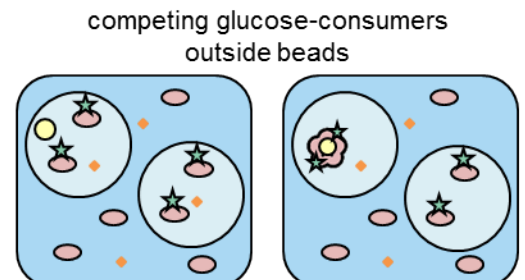

226 **Figure 1. Metabolic interactions in three-dimensional spatially structured environments. (A)**

227 The four *L. lactis* strains that were used to make synthetic consortia: 1) “producers” which take up  
228 lactose and secrete glucose, 2) “receivers” which take up glucose and express GFP, 3) “non-  
229 producers” which take up lactose but do not secrete glucose and 4) “competing glucose-consumers”  
230 which take up glucose (supplementary information, section 2). **(B)** The three-dimensional spatial  
231 structure within agarose beads. A distance of 15  $\mu\text{m}$  between cells is comparable to a homogeneous  
232 distribution of  $3 \cdot 10^8$  bacteria/mL. For visibility reasons the microscope picture shows a GFP-  
233 expressing cell surrounded by non-fluorescent cells. Aggregates used in experiments were formed  
234 oppositely: a (non-)producer cell was surrounded by GFP-expressing receivers. **(C)** The three-  
235 dimensional spatial structure between agarose beads. Aggregates were only incubated in presence of  
236 competing glucose-consumers.

237

238 To analyze if we could detect growth in agarose beads we cultured producers and receivers in  
239 beads surrounded by oil (no glucose diffusion from beads) and analyzed the beads with flow  
240 cytometry before and after incubation. Beads inoculated with mono-cultures of producers  
241 (lactose as carbon source) or receivers (glucose as carbon source) showed an increased  
242 forward scatter after incubation, indicating that cells could grow inside beads. In agreement  
243 with our expectation the fluorescence/scatter ratio of beads with growth was low for beads  
244 with producers and high for beads with GFP-expressing receivers (Figure 2B).

245 To validate that cells could also interact within beads, we made beads such that ~21% of  
246 them contained both a producer and receivers and ~79% contained receivers only. Because  
247 the metabolic interaction is unidirectional, we expected that in presence of lactose the  
248 producers would always grow, while the receivers would only grow when glucose, secreted  
249 by producers, was available to them (Figure 2A). After incubation  $14 \pm 1\%$  of the agarose  
250 beads showed an increased forward scatter, and these beads had a high fluorescence/scatter

251 ratio (Figure 2B, Table 2). This is close to the expected 21% of beads with producer and  
252 receivers, indicating that receivers could only grow in beads with producers.  
253 Together this setup forms a synthetic consortium where spatial interactions can be  
254 manipulated in a three-dimensional environment, and which allows the detection of growth  
255 and interactions using flow cytometry.

256

257 **Under glucose competition receivers cannot interact with producers ~15  $\mu\text{m}$  away**

258 In the example above glucose could not diffuse from beads and each agarose bead acted as an  
259 individual compartment. In contrast, when glucose can diffuse from agarose beads the model  
260 predicted that the glucose concentration flattens close to the producer. In that case receivers  
261 at a distance of 15  $\mu\text{m}$  from a producer in the same bead are exposed to similar glucose  
262 concentrations as receivers in beads without a producer (Figure 2C). If this prediction was  
263 correct, we expected that most receivers can grow when the global glucose concentration  
264 builds up, while in case of glucose competition the glucose concentration stays low and even  
265 receivers 15  $\mu\text{m}$  away from a producer in the same bead should not be able to grow. We  
266 therefore incubated agarose beads in CDM, which allows glucose diffusion from beads.  
267 Without competing glucose-consumers in the CDM outside the beads  $75\pm 7\%$  of the beads  
268 showed growth and these beads had a high fluorescence/scatter ratio (Figure 2D, Table 2).  
269 This indicates growth of both receivers with and receivers without a producer in their bead.  
270 When we took the same beads but added competing glucose-consumers outside the beads,  
271 only  $15\pm 3\%$  of the beads contained growth. In the beads where growth was observed the  
272 fluorescence/scatter ratio was low, indicating that only producers grew (Figure 2D, Table 2).  
273 These results are consistent with the model predictions and show that under glucose  
274 competition receivers cannot interact with producers even if they are only ~15  $\mu\text{m}$  away.

275



276 Without competing glucose-consumers still  $25\pm 7\%$  of the beads were gated as “no growth”,  
277 although the model predicted that all receivers could grow (Figure 2C and 2D). These beads  
278 could be false negatives caused by our conservative gating strategy, or by empty beads with  
279 single fluorescent cells attached to their outside. Conversely, for the beads gated as “growth”,  
280 we observed an increased fluorescence/scatter ratio compared to the single receiver controls  
281 (Figure 2D). It is known that fluorescence of individual cells increases with decreasing  
282 growth rate [32, 33], suggesting that in co-cultures the higher fluorescence/scatter ratio could  
283 be caused by glucose limited and therefore slower growth of the receivers in the beads.  
284 Together this data shows that competition for glucose in a three-dimensional environment  
285 prevents interactions at  $\sim 15\ \mu\text{m}$  distance, because the presence of competing public good-  
286 consumers leads to steep concentration gradients.

287

### 288 **Aggregated producers and receivers interact even under glucose competition**

289 In the presence of steep concentration gradients microbial interactions might be facilitated by  
290 bringing producers and receivers in close proximity. Consistently, the model predicted that  
291 cell aggregation would allow receivers to grow under glucose competition (Figure 2E). We  
292 developed a protocol to make producer-receiver aggregates. Defined aggregates were formed  
293 by adding positively charged producers to an excess of negatively charged receivers, ensuring  
294 that producers were directly surrounded by receivers. In this way we obtained a mixture of  
295 single receivers and aggregates of one producer and approximately eight receivers (Figure  
296 1B). We aimed to add an aggregate to  $\sim 21\%$  of the beads, but we could only roughly estimate  
297 the aggregate concentration in the mixture based on the added amount of positively charged  
298 cells. However, underestimating this percentage would not affect the results, as we only  
299 analyze agarose beads with growth after incubation (supplementary information, section 3).

300 We incubated the formed agarose beads in CDM with competing glucose-consumers and  
 301 after incubation we saw an increased scatter in  $3 \pm 2\%$  of the beads (Figure 2F, Table 2),  
 302 indicating only growth in beads with both producers and receivers. The fluorescence/scatter  
 303 ratio of beads with growth was increased compared to the producer mono-culture (Figure 2F),  
 304 indicating growth of both producers and receivers. Beads with grown aggregates of non-  
 305 producers and receivers showed a fluorescence/scatter ratio similar to the producer mono-  
 306 culture (Figure 2F), indicating that the aggregation protocol or the data analysis procedure did  
 307 not influence the readout.

308 Therefore, the results show that cell aggregation facilitates microbial interactions, even in a  
 309 three-dimensional system with competition for the public good.

310

311 **Table 2. Consortium response in different spatial structures.** Summary of the experimental results

312 of Figure 2.

| incubation condition                                       | cell-to-cell distance | producer + receivers (~21%)<br>receivers only (~79%) |                                | non-producer + receivers (~21%)<br>receivers only (~79%) |                                |
|------------------------------------------------------------|-----------------------|------------------------------------------------------|--------------------------------|----------------------------------------------------------|--------------------------------|
|                                                            |                       | beads with growth                                    | fluorescence/<br>scatter ratio | beads with growth                                        | fluorescence/<br>scatter ratio |
| no diffusion from beads                                    | ~15 $\mu\text{m}$     | $14 \pm 1\%$                                         | High                           | $16 \pm 0\%$                                             | Low                            |
| diffusion from beads,<br>no competing glucose<br>consumers | ~15 $\mu\text{m}$     | $75 \pm 7\%$                                         | High                           | $6 \pm 1\%$                                              | Low                            |
| diffusion from beads,<br>competing glucose<br>consumers    | ~15 $\mu\text{m}$     | $15 \pm 3\%$                                         | Low                            | $9 \pm 2\%$                                              | Low                            |
|                                                            | 0 $\mu\text{m}$       | $3 \pm 2\%$                                          | Medium                         | $4 \pm 2\%$                                              | Low                            |

313

314

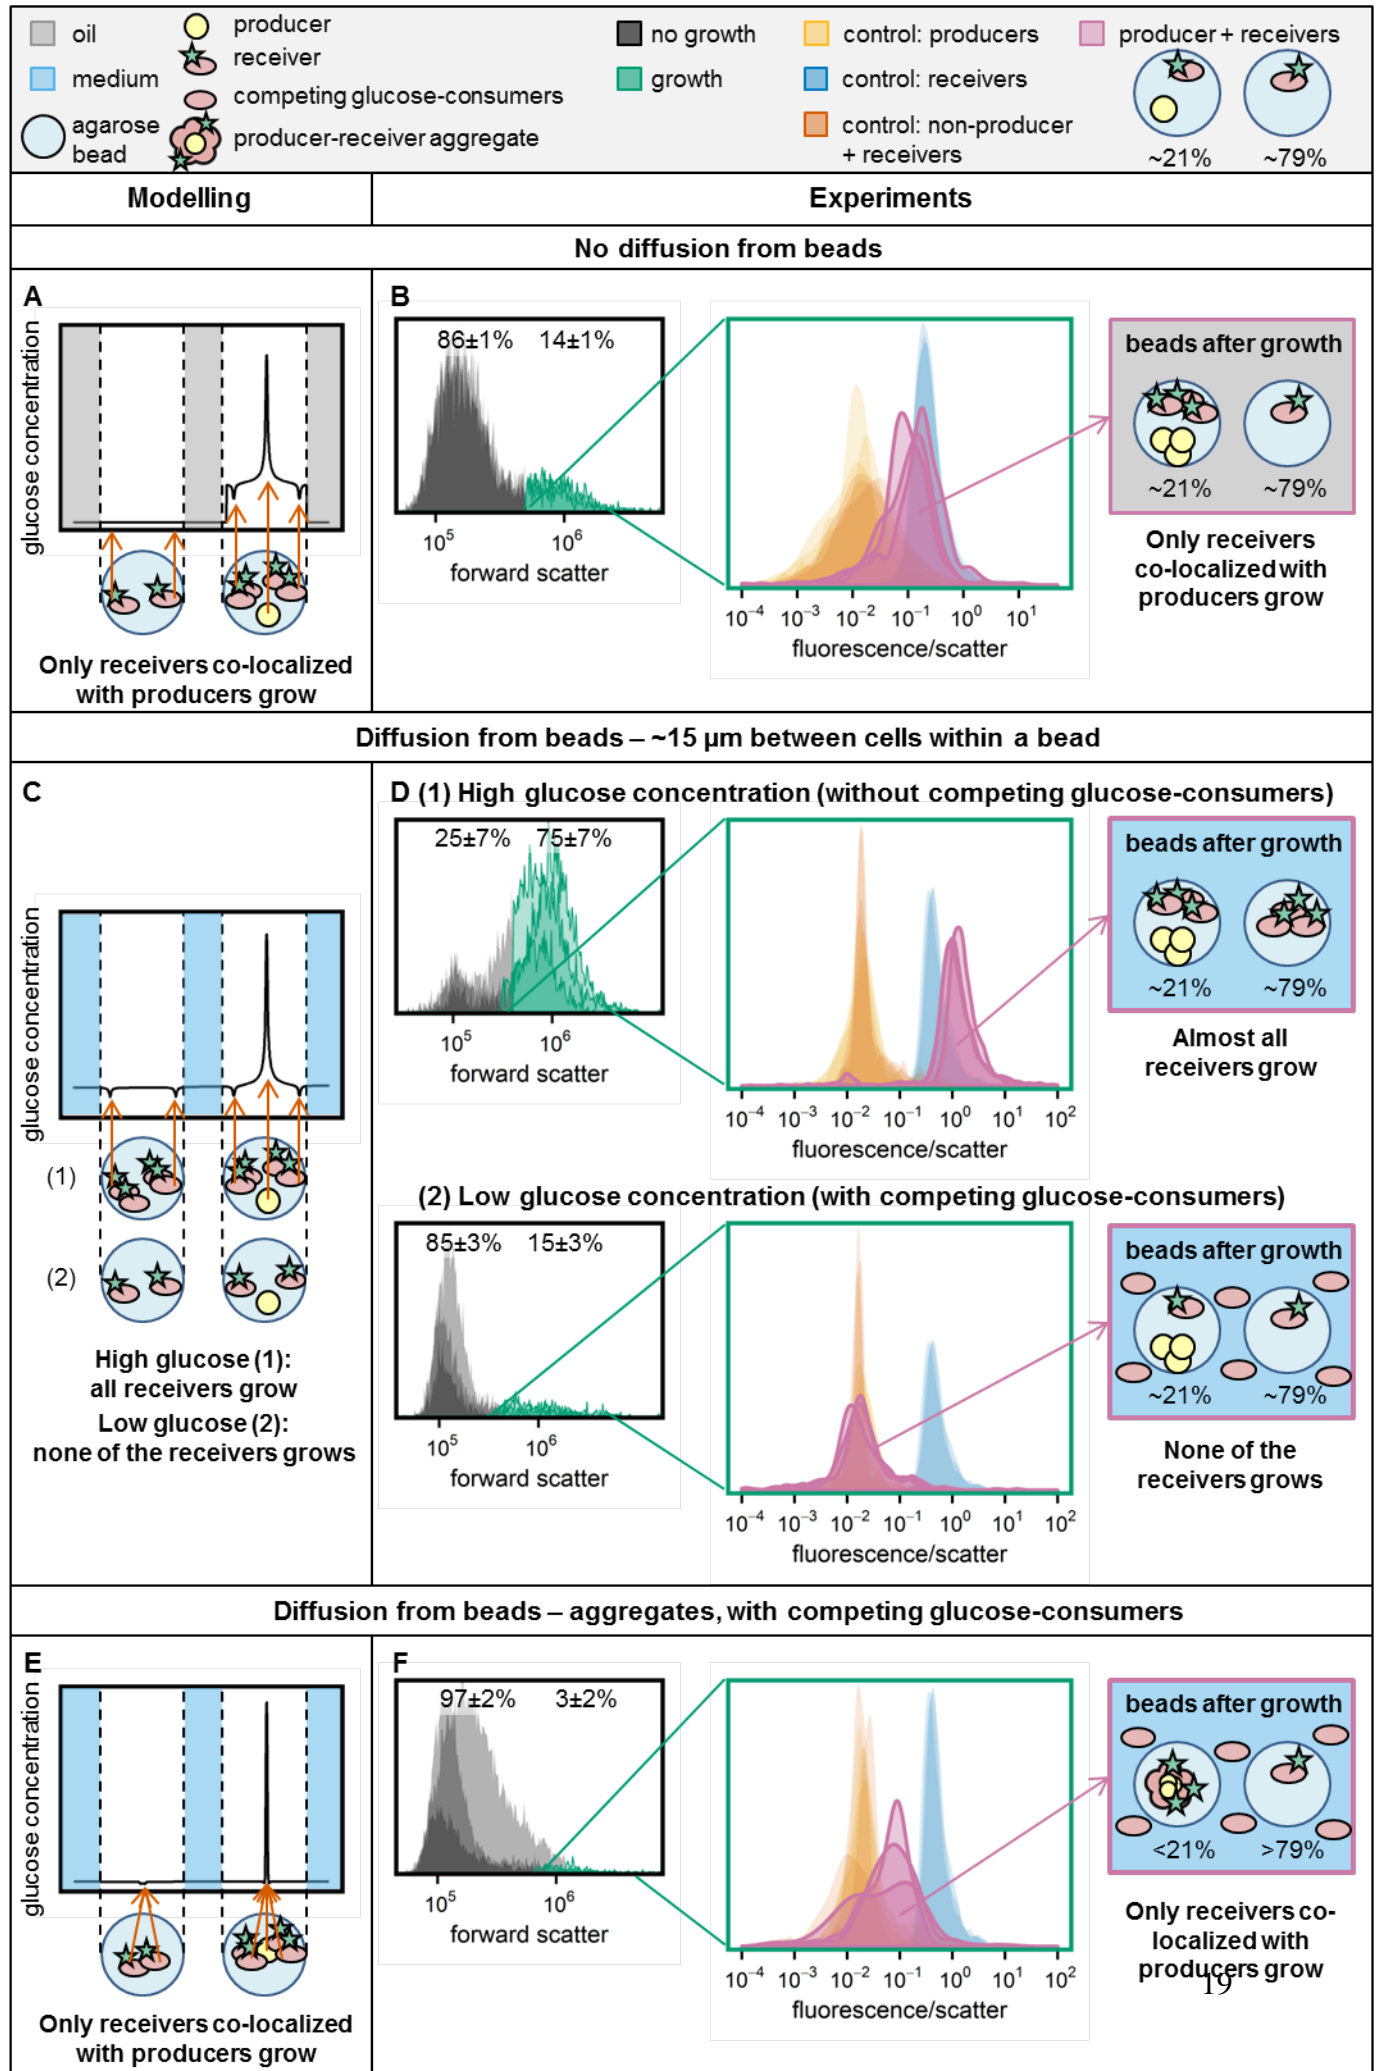

315 **Figure 2. Consortium response in different spatial structures.** Panels (A), (C), and (E) show the  
316 predicted concentration gradient at the diagonal of the cube, for the following spatial structure: (A)  
317 No diffusion from beads, (C) Diffusion from beads,  $\sim 15 \mu\text{m}$  between cells within a bead and (E)  
318 diffusion from beads, aggregated cells within a bead. In panels (B), (D) and (F) the experimental  
319 results are shown for these different spatial structures. The forward scatter histograms show the  
320 populations that were gated as “growth” in the producer-receiver co-cultures ( $n=3$ ). From these  
321 populations the fluorescence/scatter signal was determined. Next to the producer-receiver co-culture  
322 control samples were included: receivers only, producers only and co-cultures of non-producers and  
323 receivers ( $n=3$  for each of them). The non-producers and receivers, and the producers only controls  
324 are overlapping in all plots. The schematic drawing at the right is based on the experimental data and  
325 shows which cells could grow in producer-receiver co-cultures.

326

327 **Aggregation results in dense micro-colonies, facilitating growth of receivers with low**  
328 **affinity and low  $V_{\text{max}}$  glucose transporters**

329 To study the effect of glucose uptake efficiency on the receiver response, we modelled  
330 producer-receiver aggregates with receivers that have glucose-transporters with different  
331 affinities ( $K_m$ ) and maximal uptake rates ( $V_{\text{max}}$ ). Specifically, we modelled receivers that had  
332 one of the three different glucose transporters of *L. lactis* [22] (supplementary information,  
333 section 4.5). Within aggregates the effective diffusion coefficient ( $D_{\text{eff},s}$ ) is described to be  
334 10-70% of the diffusion coefficient in water ( $D_s$ ), depending on the aggregates’ density [29,  
335 31]. When we set  $D_{\text{eff},s}$  to 10% of  $D_s$ , the model predicts that receivers with the low  $K_m$  and  
336 high  $V_{\text{max}}$  transporter PTSman ( $K_m = 0.013 \text{ mM}$ ,  $V_{\text{max}} = 0.22 \mu\text{mol}/\text{min}/\text{mg protein}$ ) consume  
337 about 90 times more glucose than receivers with a high  $K_m$  or low  $V_{\text{max}}$  transporter (PTScel:  
338  $K_m = 8.7 \text{ mM}$ ,  $V_{\text{max}} = 0.25 \mu\text{mol}/\text{min}/\text{mg protein}$ , glcU:  $K_m = 2.4 \text{ mM}$ ,  $V_{\text{max}} = 0.08$   
339  $\mu\text{mol}/\text{min}/\text{mg protein}$ ) (supplementary information, section 4.5). When  $D_{\text{eff},s}$  is 70% of  $D_s$ ,  
340 this difference is almost 350 fold.

341 As the model predicted less glucose consumption by receivers with low glucose affinities and  
342 low maximal glucose uptake rates, we constitutively expressed GFP in three engineered *L.*  
343 *lactis* NZ9000 strains which each contain only one of the three glucose transporters [27]. We  
344 subsequently analyzed if their uptake was high enough to interact with producers. As we saw  
345 before, the fluorescence/scatter ratio in mono-culture controls decreased with an increasing  
346 growth rate (Figure 3 and supplementary information section 5). The data further show that in  
347 producer-receiver aggregates even the low affinity receivers could grow and the differences  
348 in fluorescence/scatter ratio between the mutants were small (2-3 fold). Based on the model  
349 this data suggests that dense micro-colonies with a low  $D_{\text{eff},s}$  were formed. Aggregates with  
350 receivers containing the low  $K_m$  and high  $V_{\text{max}}$  transporter PTSman showed the highest  
351 fluorescence/scatter ratio. Consistent with the model predictions this result suggests that  
352 PTSman containing receivers have the highest glucose uptake rate.

353 Altogether the data show that in a three-dimensional system with a metabolite consuming  
354 sink a steep concentration gradient is obtained, and cells only ~15  $\mu\text{m}$  away from each other  
355 cannot interact through glucose cross-feeding. This physical constraint can be overcome by  
356 bringing cells together in the low micrometer range, as achieved through cell aggregation -  
357 physical contact.

358

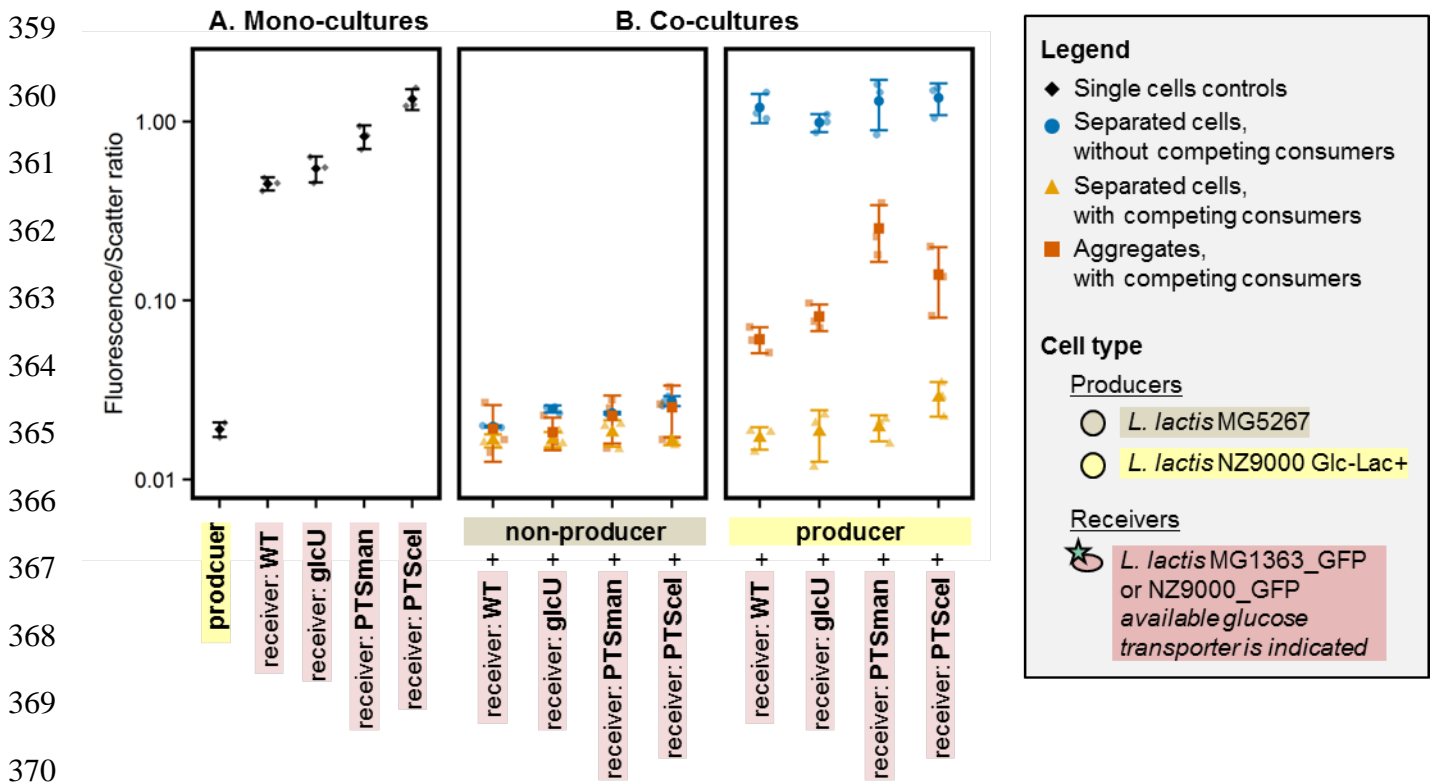

**Figure 3. Effect of glucose transporter affinity and  $V_{max}$  on the receiver response.** Mono- and co-cultures of (non-)producers and receivers with different glucose transporters were incubated in agarose beads surrounded by CDM. **(A)** Producer mono-cultures were incubated in presence of lactose, receiver mono-cultures in presence of glucose. Agarose beads contained separated cells. **(B)** Co-cultures were incubated in presence of lactose. Agarose beads contained either separated cells (~15  $\mu\text{m}$  between cells within a bead), or producer-receiver aggregates (0  $\mu\text{m}$  between cells). The beads were incubated in CDM with and without competing glucose-consumers. For each culture the median and standard error of the median of the fluorescence/scatter ratio is shown (n=3). Receivers are ordered based on their growth rate (supplementary information section 5).

## 381 Discussion

382 Contact-independent interactions can be local or global, depending on the profile of the  
383 concentration gradient. Previous studies quantified interaction distances either in monolayers  
384 of cells (two-dimensional system) or in absence of a competing metabolite-sink [13, 14].  
385 While these studies give valuable insight, they have a limited resemblance to natural  
386 ecosystems, which are typically three-dimensional and harbor competing organisms and other  
387 metabolite-removing sinks. A reaction-diffusion model predicted that in three-dimensional  
388 systems the concentration gradient drops much faster than in two-dimensional systems (the  
389 maximal concentration is halved at 0.6  $\mu\text{m}$  instead of 24  $\mu\text{m}$ ), suggesting that in natural  
390 ecosystems interaction ranges might be much shorter than the *in vitro* two-dimensional  
391 systems predict. To better understand how concentration gradient constraints affect the  
392 composition and fitness of natural communities, we analyzed the impact of cell-to-cell  
393 distance on unidirectional cross-feeding in three dimensions in the presence and absence of a  
394 competing metabolite consumer as a public good-removing sink.

395  
396 Without competing glucose-consumers we observed a global response: receivers grew at all  
397 distances from producers (Figure 2D, Table 2). When we added competing glucose-  
398 consumers only receivers aggregated with producers could grow (Figure 2D and 2F, Table 2).  
399 Diener *et al.* observed a similar pattern of local and global interactions during *S. cerevisiae*  
400 mating [14]. Haploid cells secrete a peptide, which is sensed and degraded by haploid cells of  
401 the opposite mating type. This results in a local high peptide concentration and local  
402 interactions: cells from opposite mating types initiate mating specifically in each other's  
403 direction. However, incubation of mutants that could not degrade the peptide resulted in a  
404 global high peptide concentration, and independent of their location cells initiated mating in  
405 different directions. For wildtype cells Diener *et al.* predicted that the maximum information

406 content of the peptide distribution is similar for cells ~17 and ~2  $\mu\text{m}$  away from each other  
407 [14], suggesting that yeast cells interact efficiently when they are 17  $\mu\text{m}$  away from each  
408 other. Similar interaction distances (3.2-12.1  $\mu\text{m}$ ) were found by Dal Co *et al.* when they  
409 grew bidirectionally cross-feeding *E. coli* cells in a microfluidic chamber [13]. Our data  
410 however show that in a three-dimensional environment with a metabolite-sink the interaction  
411 distances are shorter, as producers and receivers ~15  $\mu\text{m}$  away from each other could not  
412 cross-feed (Figure 2D). Within aggregates cross-feeding was possible, but it was still less  
413 efficient than what was achieved in presence of high concentrations of the secreted  
414 metabolite (Figure 2B and 2F).

415 These results match the model prediction that interaction distances in three-dimensional  
416 systems are shorter than in two-dimensional systems. It furthermore indicates that the  
417 presence of a metabolite-sink also affects the interaction distance. In the set-ups of Dalco *et*  
418 *al.* and Diener *et al.* the metabolite is degraded/consumed only by the receiver itself, so the  
419 metabolite concentration will only decrease close to receiver cells. When receivers compete  
420 with other metabolite-sinks, such as competing metabolite consumers or a dilute system, the  
421 overall metabolite concentration will be lowered, resulting in shorter interaction distances.  
422 Indeed, Koschwanez *et al.* showed that at low cell densities and low sucrose concentrations,  
423 where the volume acts as the main metabolite-sink, *S. cerevisiae* cannot grow, even though  
424 invertase splits sucrose into glucose and fructose in the periplasmic space, so very close to the  
425 receiver cell [8].

426

427 In the presence of a competing metabolite-sink the concentration of the exchanged metabolite  
428 is low, and we therefore expected that variation in the receivers' import affinity would  
429 influence the interaction efficiency. However, within aggregates we observed only small  
430 differences in growth of high and low affinity receivers (Figure 3), suggesting that dense



431 micro-colonies with a low diffusion rate were formed (supplementary information, section  
432 4.1). Aggregating cells therefore seem to kill two birds with one stone: they decrease both the  
433 cell-to-cell distance and the diffusion rate, two factors which were previously reported to  
434 promote interaction [15, 34]. The resulting increase of the local concentration might also  
435 explain why Koschwanez *et al.* saw that yeast cells which could not grow on low sucrose  
436 concentrations due to their low cell density, could grow when the same amount of cells was  
437 aggregated [8].

438 In our set-up the local glucose concentration increases with time, because the producers grew  
439 independently from the receivers. Future research could focus on bidirectional cross-feeding  
440 systems, where producer growth is limited by receiver growth. In that case the initial  
441 production rate will be lower and receiver affinity might play a bigger role.

442

443 Controlled metabolite exchange is a critical feature of living cells [35], and forms the basis  
444 for extracellular metabolism of nutrients and interactions with other cells. Concentration  
445 gradients constrain the distance over which these interactions can occur and it therefore  
446 shaped the evolution of the molecular mechanisms involved in these interactions. Slow  
447 diffusion of large, aggregated resources like particulate iron ( $>0.4 \mu\text{m}$ ) can for instance cause  
448 cellular iron uptake to become diffusion limited. It is therefore hypothesized that cells secrete  
449 siderophores to form fast diffusing iron-siderophore complexes after iron dissolution, in this  
450 way increasing their iron uptake rate [36]. It is furthermore known that many extracellular  
451 substrate-degrading enzymes are attached to the cell, which places the source (enzyme) close  
452 to the receiver (cell). Invertase is for instance located in the periplasmic space of *S. cerevisiae*  
453 [37], the protease of *L. lactis* is attached to the cell wall [9] and in both fungi and bacteria  
454 cellulosomes are also attached to the cell wall [38]. Hauer *et al.* argue that when a producer  
455 also benefits from its own product, which is the case for extracellular enzymes, spatially

456 structured localization of cells is only advantageous when the enzyme production costs are  
457 high [39]. Attachment of extracellular enzymes to the cell wall therefore suggests that these  
458 enzymes are costly, and indeed, Bachmann *et al.* showed in *L. lactis* that protease negative  
459 strains outcompeted protease positive strains with a cell wall bound protease, unless they  
460 were >1 mm apart (cell density of <math>10^3</math> cells/mL) [9].

461 In the presence of a competing public good-sink interacting cells can aggregate, for example  
462 in biofilms, to reduce the diffusion distance and diffusion rate [40], which increases the  
463 efficiency of their interactions [15, 34]. During evolution of cooperation in which costly  
464 compounds are secreted, wildtype non-cooperators typically form such a competing public  
465 good-sink, indicating that cell-to-cell distances well below 15  $\mu\text{m}$  are required to evolve  
466 costly cooperation. However, aggregation is not always increasing interaction efficiency,  
467 because it also slows down the diffusion of inhibiting metabolic end-products from the  
468 micro-colony and the diffusion of extracellular nutrients into the micro-colony. Aggregation  
469 of the cross-feeding yoghurt consortium (*Lactobacillus bulgaricus* and *Streptococcus*  
470 *thermophilus*) in 100-300  $\mu\text{m}$  capsules reduced for instance their growth and acidification  
471 rates, and proteolysis was only faster in the first hour [41], indicating that in this case the  
472 aggregation costs did not outweigh the benefits. Aggregation also allows (evolution of)  
473 contact-dependent transfer mechanisms, like nanotubes or vesicle chains. To our knowledge  
474 *L. lactis* does not exchange cytosolic material using these contact-dependent transfer  
475 mechanisms and the model indicates that just diffusion can explain our experimental results.  
476

477 Consequences of concentration gradient constraints are not limited to bacteria and yeasts.  
478 Plants, fungi and other (organisms with) large cells use intracellular concentration gradients  
479 to regulate amongst others cell polarity, cell division and cell size [42–44]. Although the rate  
480 of diffusion in the cytoplasm is fast, cells can use spatially structured protein modification

481 systems as source or sink, to create concentration gradients [45, 46]. It is therefore important  
482 to think about the constraints - and opportunities - that concentration gradients may impose  
483 on cellular interactions, how it shaped their evolution and their role in microbial consortia,  
484 and how researchers can use these principles to understand and steer these processes.  
485

486 **Acknowledgements**

487 We thank Sieze Douwenga and Daan de Groot for fruitful discussions.

488

489 R.J.v.T., I.v.S., E.Z., J.A.H., O.P.K, B.T. and H.B. were financed by the Netherlands

490 Organisation for Scientific Research (NWO), as part of the research programme TTW with

491 project number 13858.

492 A.L. and T.R. were financed by the Slovenian Research Agency (Grant no. J4-7640, J1-9194,

493 N1-0100), international grant supported by Helmholtz-Zentrum Dresden-Rossendorf and the

494 European Commission (Grant no. 826312) and the European Regional Development Fund

495 (Grant No. UIA02-228).

496

497 **Author contributions**

498 R.J.v.T., B.T. and H.B. conceived the study, designed experiments, interpreted the data and

499 wrote the paper. R.J.v.T., I.v.S. and E.Z. carried out the experiments. T.R. and A.L.

500 developed the aggregation protocol. C.P. and R.J.v.T. built the COMSOL Multiphysics

501 model. J.A.H. and O.P.K. constructed the strains *L. lactis* NZ9000\_PTSman\_GFP, *L. lactis*

502 NZ9000\_PTScel\_GFP and *L. lactis* NZ9000\_glcU\_GFP. All authors helped improving the

503 manuscript.

504

505 **Competing interests statement**

506 H.B. is also employed by NIZO Food Research, a contract research organization. NIZO Food

507 Research had no role in the study design, data collection and analysis, decision to publish, or

508 preparation of the manuscript.

509

510 **Supplementary information**

511 **Section 1: Agarose bead size- and volume-distributions**

512 We prepared agarose beads surrounded by oil and made pictures with a microscope (9 per  
513 emulsion, Figure S1A shows an example). Pictures were subsequently analyzed with ImageJ  
514 to identify the beads (Figure S1B), and to measure size- and volume distributions (Figure  
515 S1C and S1D). Small droplets were not always identified, but as they contain only little  
516 volume this only marginally affects the analysis. Beads on the edge of the picture were  
517 excluded from the analysis. Formed emulsions were polydisperse but distributions of  
518 replicates were reproducible, with mean volume  $\pm$  SEM of  $26\pm 2$  pL (diameter of  $37\ \mu\text{m}$ ).

519

520

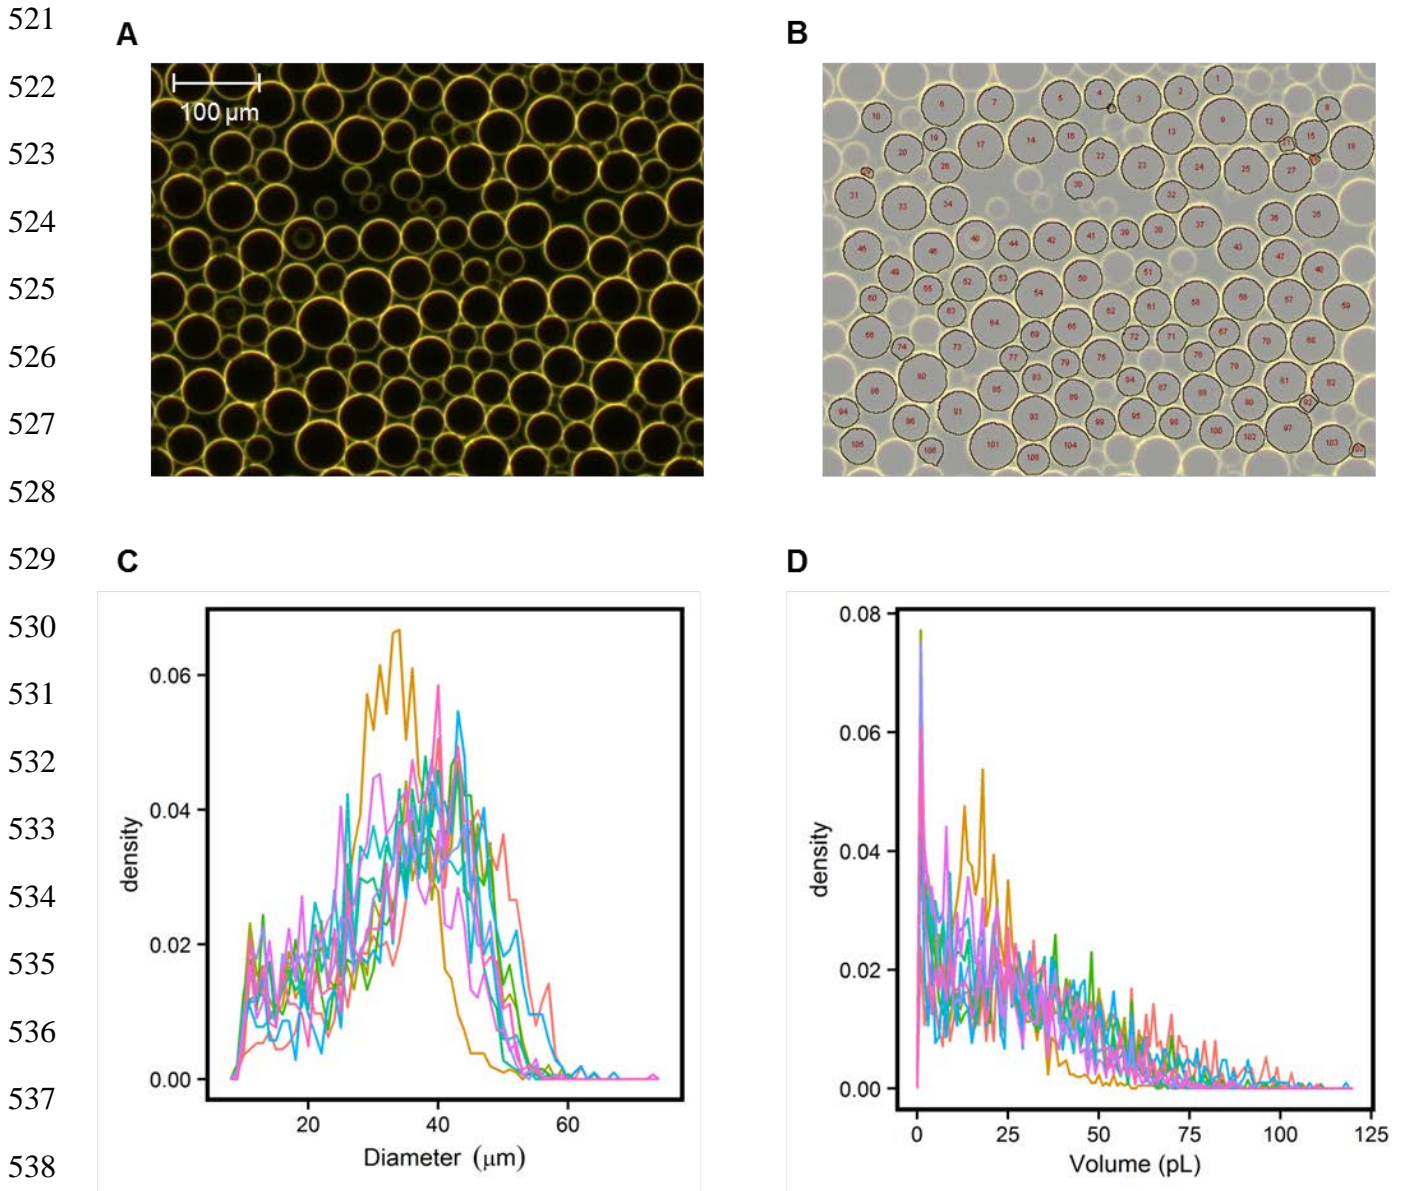

539 **Figure S1. Agarose bead size and volume.** (A) An example microscope picture of agarose beads.

540 (B) Agarose beads identified in (A) after ImageJ analysis. (C and D) Agarose bead size (C) and

541 volume (D) distribution (n=10 emulsions, 9 pictures per emulsion).

542

543 **Section 2:  $10^9$  *L. lactis* MG1363 cells/mL as competing glucose-consumers**

544 To establish if addition of  $10^9$  *L. lactis* MG1363 cells per mL outside agarose beads  
545 prevented cross-talk between beads, we mixed beads with producers and beads with receivers  
546 and incubated them in presence of lactose in different spatial structures (Figure S2). After  
547 incubation surrounded by oil only producers were grown, which was expected as glucose  
548 could not diffuse from beads. When glucose could diffuse from beads and no *L. lactis*  
549 MG1363 cells were added outside the beads, both producers and receivers grew. However, in  
550 presence of  $10^9$  *L. lactis* MG1363 cells per mL outside the agarose beads only producers  
551 grew, suggesting that glucose leaving beads with producers was mainly consumed by  
552 *L. lactis* MG1363 cells outside the beads and did not reach receivers in neighboring beads.  
553 The glucose concentration outside the beads probably did not exceed the low micro-molar  
554 range, as the  $K_m$  for glucose of the highest affinity transporter in *L. lactis* MG1363 is 13  $\mu\text{M}$   
555 [22] and the *L. lactis* MG1363 cell density was high.

556

557  
558  
559  
560  
561  
562  
563  
564  
565  
566  
567  
568  
569  
570

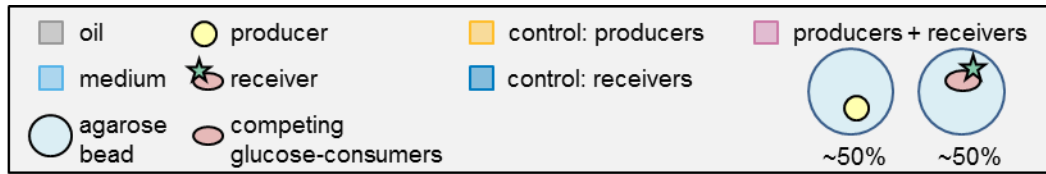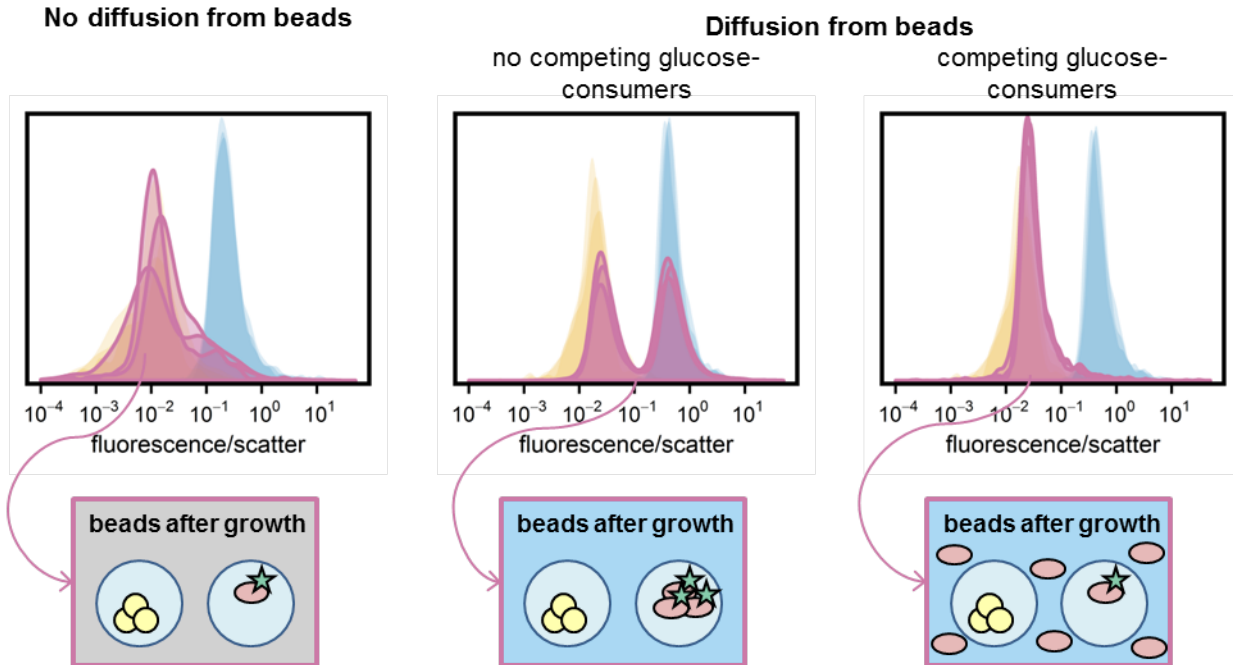

571 **Figure S2: Addition of *L. lactis* MG1363 outside agarose beads prevents cross-talk between**  
572 **beads.** Agarose beads with producers and agarose beads with receivers were mixed and incubated in  
573 three different spatial structures: surrounded by oil (no diffusion from beads, n=3), surrounded by  
574 CDM without *L. lactis* MG1363 (no competing glucose-consumers, n=3) and surrounded by CDM  
575 with  $10^9$  single *L. lactis* MG1363 cells per mL (competing glucose-consumers, n=3). Histograms  
576 show the fluorescence/scatter ratio of the populations that were gated as "growth".



577 **Section 3: Flow cytometry gating strategy and data analysis**

578 Figure S3 shows the flow cytometry gating strategy and data analysis procedure.

579

580

581 **Overview: Raw data after incubation**

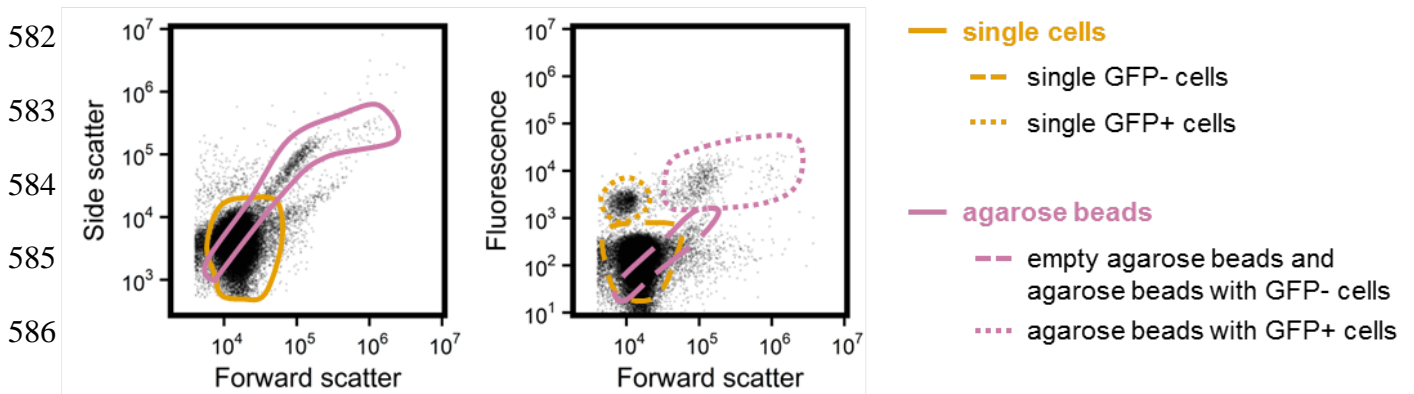

587 **Step 1. Gate the filled agarose beads**

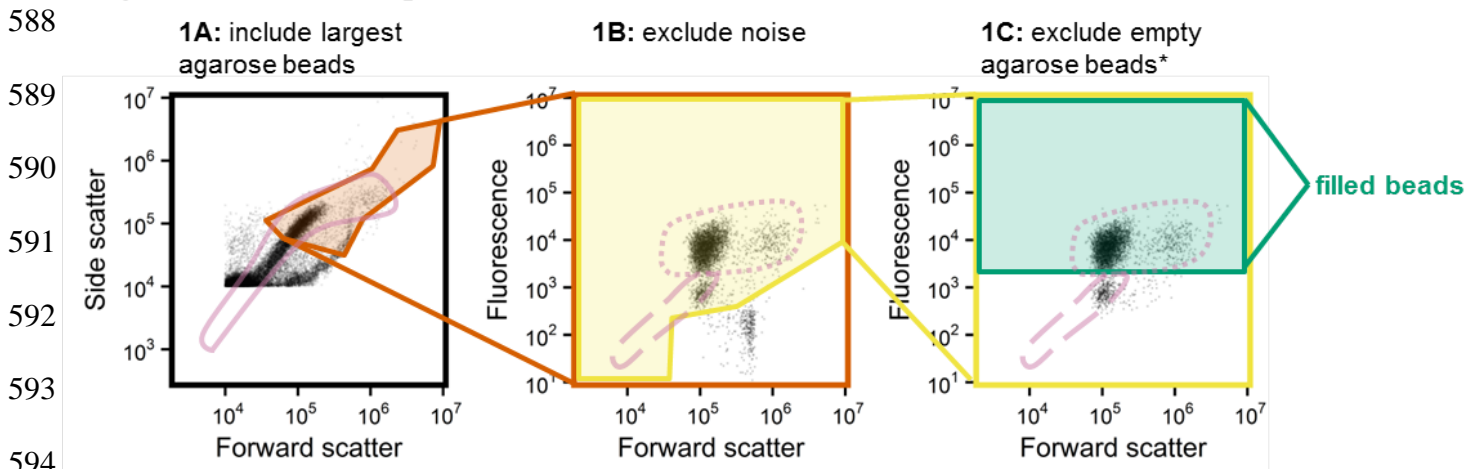

\*This step is excluded for samples containing agarose beads with only GFP- cells

595 **Step 2. Separate beads with and beads without growth**

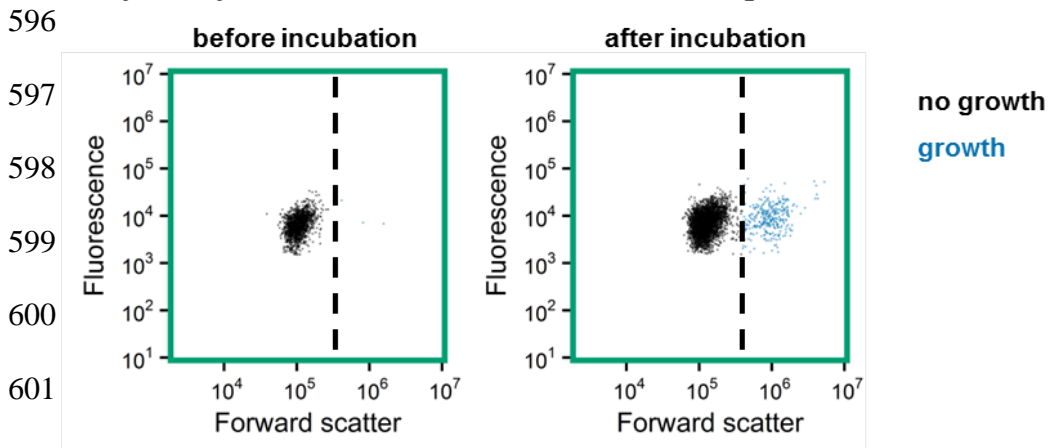

603 **Step 3. Calculate fluorescence/scatter ratio**

- 604
- 605
- Subtract the mean side scatter and fluorescence before incubation from the side scatter and fluorescence after incubation (background correction)
  - Calculate the ratio between the corrected fluorescence and side scatter to identify which celltypes were grown inside the agarose beads

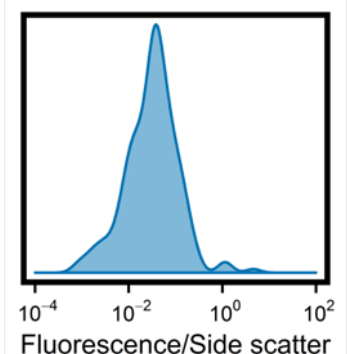

606 **Figure S3. Flow cytometry gating strategy and data analysis.**

607 **Overview.** Each agarose bead sample was measured twice. We first acquired an overview of the  
608 complete sample, containing both single cells and agarose beads. Drawn gates were based on  
609 measurements of empty agarose beads and single cells. Thereafter we used an increased forward and  
610 side scatter threshold to leave out most of the single cells, this data was used for gating and data  
611 analysis. **Step 1.** Beads containing cells (“filled beads”) were gated by including the largest agarose  
612 beads and excluding the noise and the empty agarose beads. For the control samples with only  
613 producers empty beads were not excluded, because before incubation agarose beads with GFP-  
614 producers could not be separated from empty beads. **Step 2.** Beads with and without growth were  
615 separated with a forward scatter threshold. This threshold was set for each sample individually, based  
616 on the forward scatter before incubation. This stringent gating might underestimate the amount of  
617 beads with growth, but it ensures that beads without growth are excluded from analysis. **Step 3.** The  
618 side scatter and fluorescence were background-corrected based on their values before incubation. The  
619 distribution of fluorescence/scatter ratios of background-corrected data is plotted to identify which  
620 cell-types were grown inside the agarose beads.

621

622 **Section 4: Reaction-diffusion model in COMSOL Multiphysics**

623 **4.1 Geometry of the agarose bead model**

624 Figure S4 shows the geometry of agarose bead model.

625

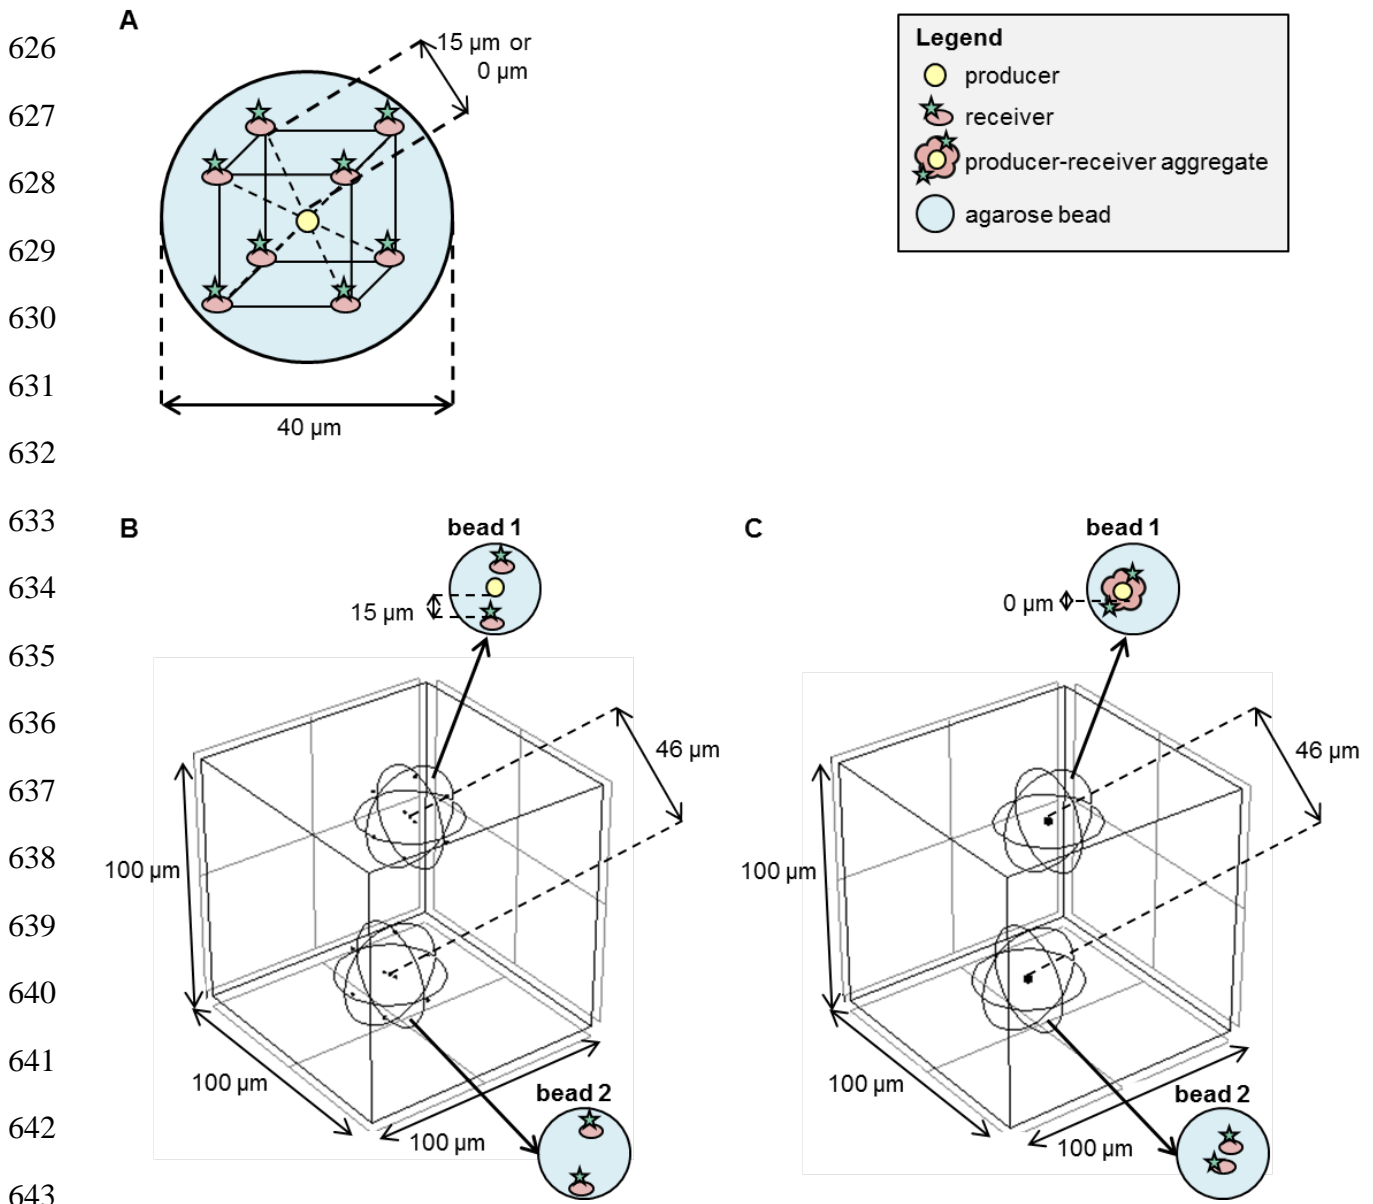

644 **Figure S4: Model geometry implemented in COMSOL Multiphysics.** (A) An agarose bead (sphere  
 645 with diameter of 40 μm) contains 8 receiver cells and 0 or 1 producer cells. Each cell is a sphere with  
 646 a diameter of 1 μm. Within the agarose bead receivers are placed at the virtual corners of a cube, and  
 647 the producer in the middle. The distance between the surface of producers and receivers is either 0 or  
 648 15 μm. **(B and C)** An agarose bead with one producer (bead 1) and an agarose bead without a  
 649 producer (bead 2) are placed in a cube of 100 μm (corresponding to  $2 \cdot 10^6$  beads/mL). In (B) the  
 650 distance between the producer and receiver is 15 μm, in (C) they are in contact (0 μm). Producers and  
 651 receivers in contact are placed in a micro-colony (sphere with a diameter of 4 μm) with a reduced  
 652 diffusion coefficient ( $D_{\text{eff},s}$ ).

653

## 654 4.2 Reaction-diffusion model and parameter values

655 *Material balance.* The spatial distribution (x,y,z) and change in time (t) of the concentration  
656  $C_s$  (mol/m<sup>3</sup>) of glucose in the bead and surrounding liquid resulted from solving the partial  
657 differential equation which balances the diffusion rate with a reaction rate  $r_s$ :

$$\frac{\partial C_s}{\partial t} = D_s \left( \frac{\partial^2 C_s}{\partial x^2} + \frac{\partial^2 C_s}{\partial y^2} + \frac{\partial^2 C_s}{\partial z^2} \right) + r_s$$

658  
659 *Diffusion.* The same diffusion coefficient of glucose,  $D_s$  (m<sup>2</sup>/s), was used outside and inside  
660 the agarose beads. It was set to the value of  $D_s$  in water [29], because  $D_s$  in agarose gels is  
661 similar to that in water [30]. The effective diffusion coefficient in micro-colonies depends on  
662 the void fraction, i.e. volume not occupied by cells per total micro-colony volume, and the  
663 tortuosity [13, 40]. Cells growing in an agarose matrix form dense colonies, therefore the  
664 effective diffusion coefficient within the colonies ( $D_{\text{eff},s}$ ) was set to 10% of the diffusion  
665 coefficient in water ( $D_s$ ) [29, 31].

666  
667 *Reaction.* The net glucose rate  $r_s$  (mol/m<sup>3</sup>/s) results as the difference between production and  
668 consumption at a certain position in space,  $r_s = q_p C_x - q_s C_x$ . The specific glucose production  
669 rate ( $q_p$ ) of *L. lactis* NZ9000 Glc-Lac+ is the same as its specific lactose uptake rate, as each  
670 lactose molecule contains one glucose molecule. The  $q_p$  was therefore set to a constant value  
671 of 1 molP/CmolX/h [47] and applied within the producer cells. Simulations which did include  
672 the lactose concentration and Monod kinetics for lactose consumption yielded similar results  
673 as simulations with a constant  $q_p$ , therefore we adopted the simpler constant rate. For  
674 receivers the glucose uptake was assumed with a saturation (Monod) kinetics,  
675  $q_s = q_s^{\text{max}} \cdot C_s / (K_s + C_s)$ . We used the  $K_s$  of the highest affinity glucose transporter of *L. lactis*  
676 MG1363 [22], and  $q_s^{\text{max}}$  was set to 1 molS/CmolX/h [48]. To calculate the biomass  
677 concentration  $C_x$  (CmolX/m<sup>3</sup>) we assumed a molecular weight of biomass of 24.6 grams per

678 Cmol dry biomass ( $\text{CH}_{1.8}\text{O}_{0.5}\text{N}_{0.2}$ ) [49, 50], a cellular water content of 70 wt% [51] and a  
679 cellular density of 1000 g/L [51]. These values lead to a glucose production or maximal  
680 glucose consumption rate of 38 mol/m<sup>3</sup>/s. A competing glucose-consumer was modelled by  
681 adding glucose consumption outside agarose beads with the same Monod kinetics as that of  
682 receivers. Cell growth was not incorporated in the model.

683

684 *Boundaries.* The concentration at the agarose bead surface was based on a partition  
685 coefficient which was set to 0 when incubation in oil was modelled, and to 1 for incubation in  
686 CDM. The liquid domain (cube) boundaries were insulated (no-flux boundary condition).

687

688 *Parameters.* Table S1 lists the default parameters used in the COMSOL Multiphysics model  
689 with sources for their values.

690

691 **Table S1: Default parameter values of the COMSOL Multiphysics model**

| Parameter                                         | Symbol             | Value                                  | Source   |
|---------------------------------------------------|--------------------|----------------------------------------|----------|
| Maximum specific uptake rate of glucose           | $q_s^{\max}$       | 38 mol/m <sup>3</sup> /s               | [48]     |
| Specific production rate of glucose               | $q_p$              | 38 mol/m <sup>3</sup> /s               | [47]     |
| Half-saturation (Monod) coefficient               | $K_s$              | 0.01 mM                                | [22]     |
| Diffusion coefficient in water and agarose beads  | $D_s$              | $6.7 \cdot 10^{-10}$ m <sup>2</sup> /s | [29]     |
| Effective diffusion coefficient in micro-colonies | $D_{\text{eff},s}$ | $0.1 \cdot D_s$                        | [29, 31] |

692

### 693 **4.3 Predicted concentration gradients in two- and three-dimensional reaction-diffusion** 694 **systems**

695 To analyze the difference in concentration gradients in two- and three-dimensional systems  
696 we modelled production by one producer cell in two different geometries, as represented in  
697 Figure S5. In the two-dimensional system the model predicts that the product concentration is

698 halved at 24  $\mu\text{m}$  from the producer, whereas in the three-dimensional system this happens at  
699 only 0.6  $\mu\text{m}$ .

700

701

702

703

704

705

706

707

708

709

710

711

712

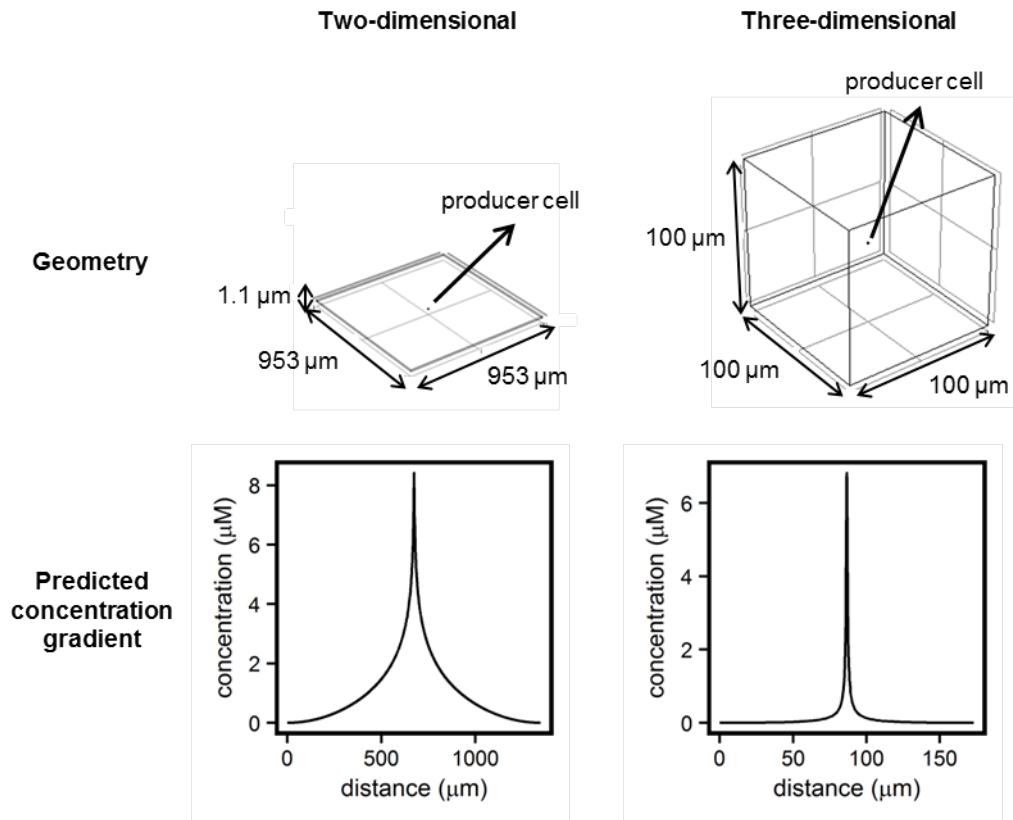

713 **Figure S5: Predicted concentration gradients in two- and three-dimensional reaction-diffusion**

714 **systems.** A producer cell with a diameter of 1  $\mu\text{m}$  was placed in the middle of a very thin rectangular

715 block (1.1  $\mu\text{m}$  thickness) to represent a quasi-two-dimensional system. For the three-dimensional

716 system it was placed in the middle of a cube. For the cube, concentrations at the cube boundaries were

717 set to zero. For the thin plate the concentrations at the four lateral faces were set to zero, and the

718 top and bottom boundaries were insulated (no-flux boundary condition). The total volume of

719 both systems was 1 nL ( $1 \cdot 10^6$  cells/mL). A time dependent study in COMSOL Multiphysics

720 yielded concentration gradients at several moments. The figure shows the concentrations

721 along the diagonal after 5 hours.

722

723



724 **4.4 Sensitivity analysis for  $q_p$  and  $q_s^{\max}$**

725 Figure S6 shows the predicted glucose concentration (Figure S6A) and glucose production  
726 rate (Figure S6B) over a plane crossing the producer cell and four of the eight receiver cells.  
727 Profiles for aggregated cells and for cells  $\sim 15 \mu\text{m}$  away from each other are shown. Because  
728 it is difficult to know the actual  $q_p$  and  $q_s^{\max}$  inside agarose beads, we also performed a  
729 sensitivity analysis (Figure S7). A 5-fold change in  $q_p$  and  $q_s^{\max}$  resulted in similar  
730 concentration gradients and it did not affect our hypotheses.

### A. Glucose concentration

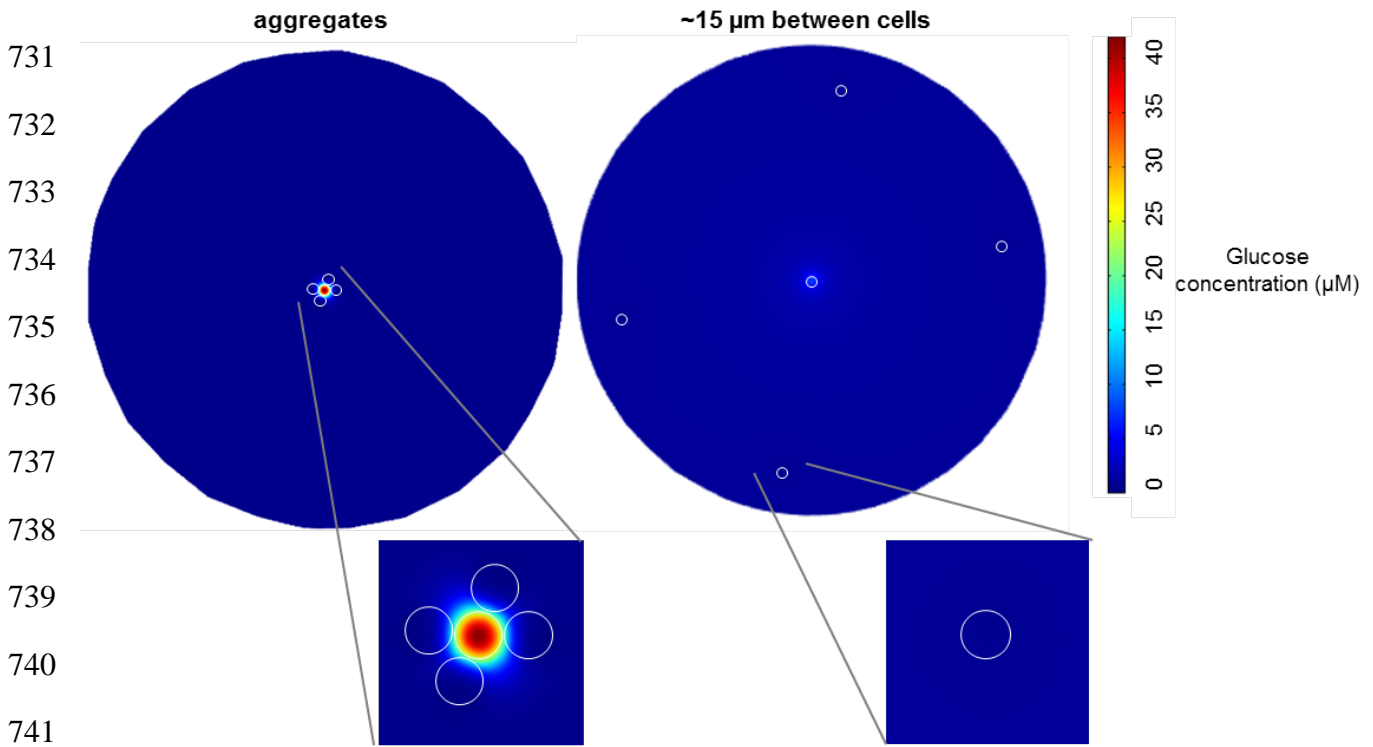

### B. Glucose production rate

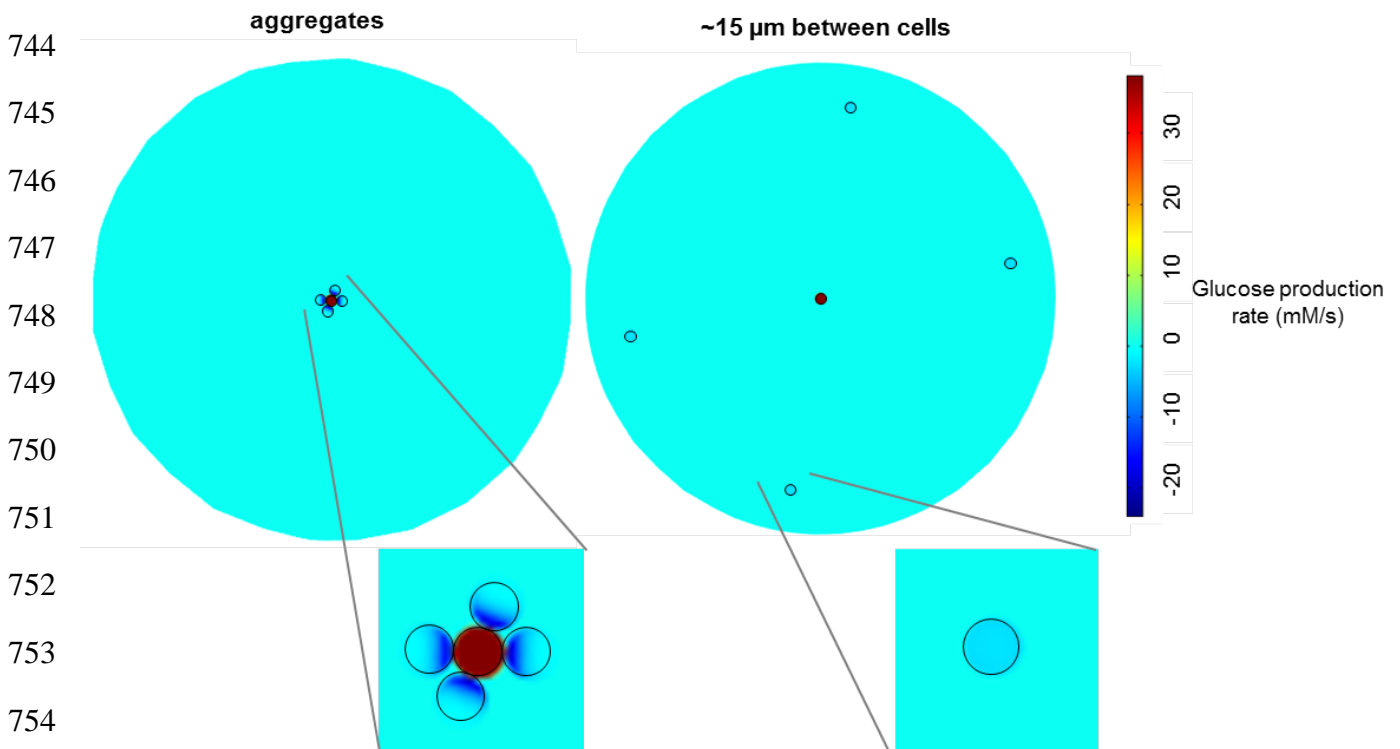

755 **Figure S6: Predicted glucose concentration (A) and glucose production rates (B) in agarose**  
756 **beads surrounded by CDM.** The glucose concentration (A) and the glucose production rate (B) are  
757 plotted over a plane crossing the producer cell and four of the eight receiver cells. Profiles for  
758 aggregated cells and for cells  $\sim 15 \mu\text{m}$  away from each other are shown.

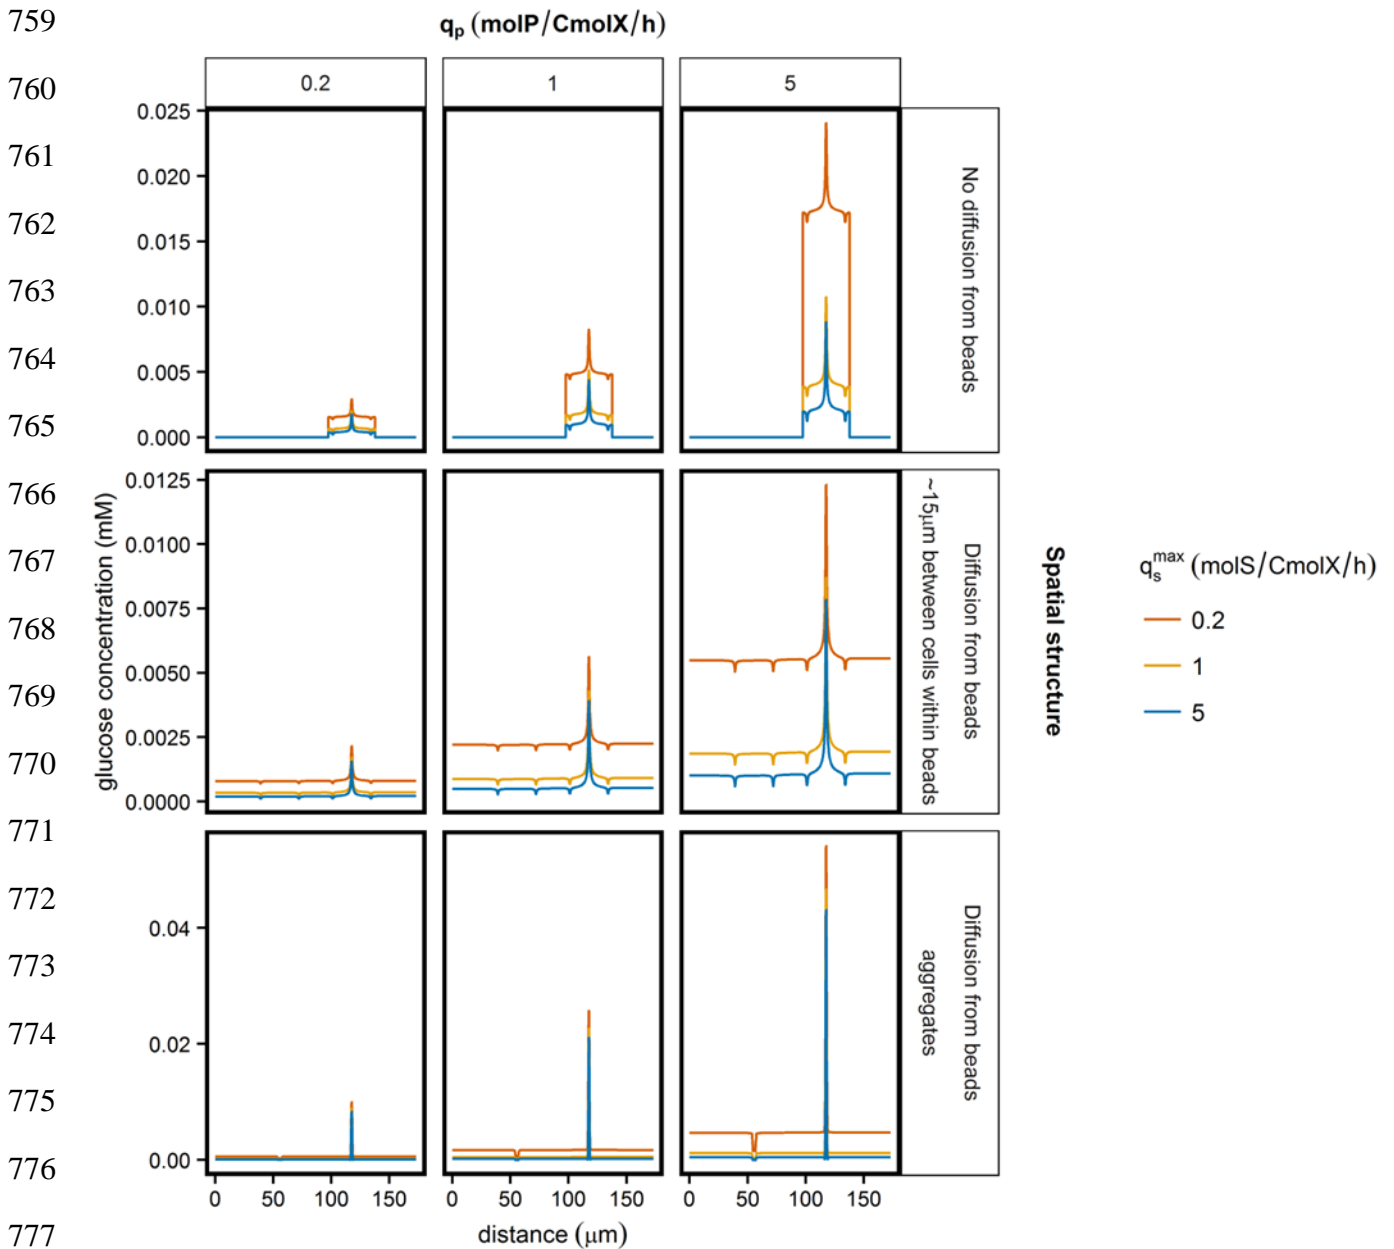

778 **Figure S7: Predicted concentration gradients after varying  $q_p$  and  $q_s^{\text{max}}$ .**  $q_p$  and  $q_s^{\text{max}}$  were  
779 increased and decreased five-fold and the effects on the predicted concentration gradients in different  
780 spatial structures are shown.

781

#### 782 **4.5 Model predictions for the glucose uptake of receivers with different affinities**

783 We analyzed the effect of the glucose affinity of receivers on their ability to utilize the  
784 glucose made by the producer. To model the individual glucose transporters of *L. lactis*  
785 MG1363 in COMSOL the  $K_s$  values as reported by Castro *et al.* were used [22]. For *L. lactis*  
786 NZ9000\_GFP\_glcU the  $q_s^{\max}$  was reduced with a factor four, which reflects the differences in  
787  $V_{\max}$  of the transporters [22]. We calculated the glucose uptake for the different mutants after  
788 5 hours in presence of competing glucose-consumers, without considering growth of the cells  
789 (Figure S8). The effective diffusion coefficient ( $D_{\text{eff},s}$ ) varies from 10-70%, depending on the  
790 density of the micro-colony [29, 31]. Figure S7 shows the glucose uptake when  $D_{\text{eff},s}$  is 10%,  
791 30% and 70%. We included a sensitivity analysis for five-fold changes in  $q_p$  and  $q_s^{\max}$  values,  
792 which all showed similar trends as the reference (1x  $q_p$  and 1x  $q_s^{\max}$ ).

793

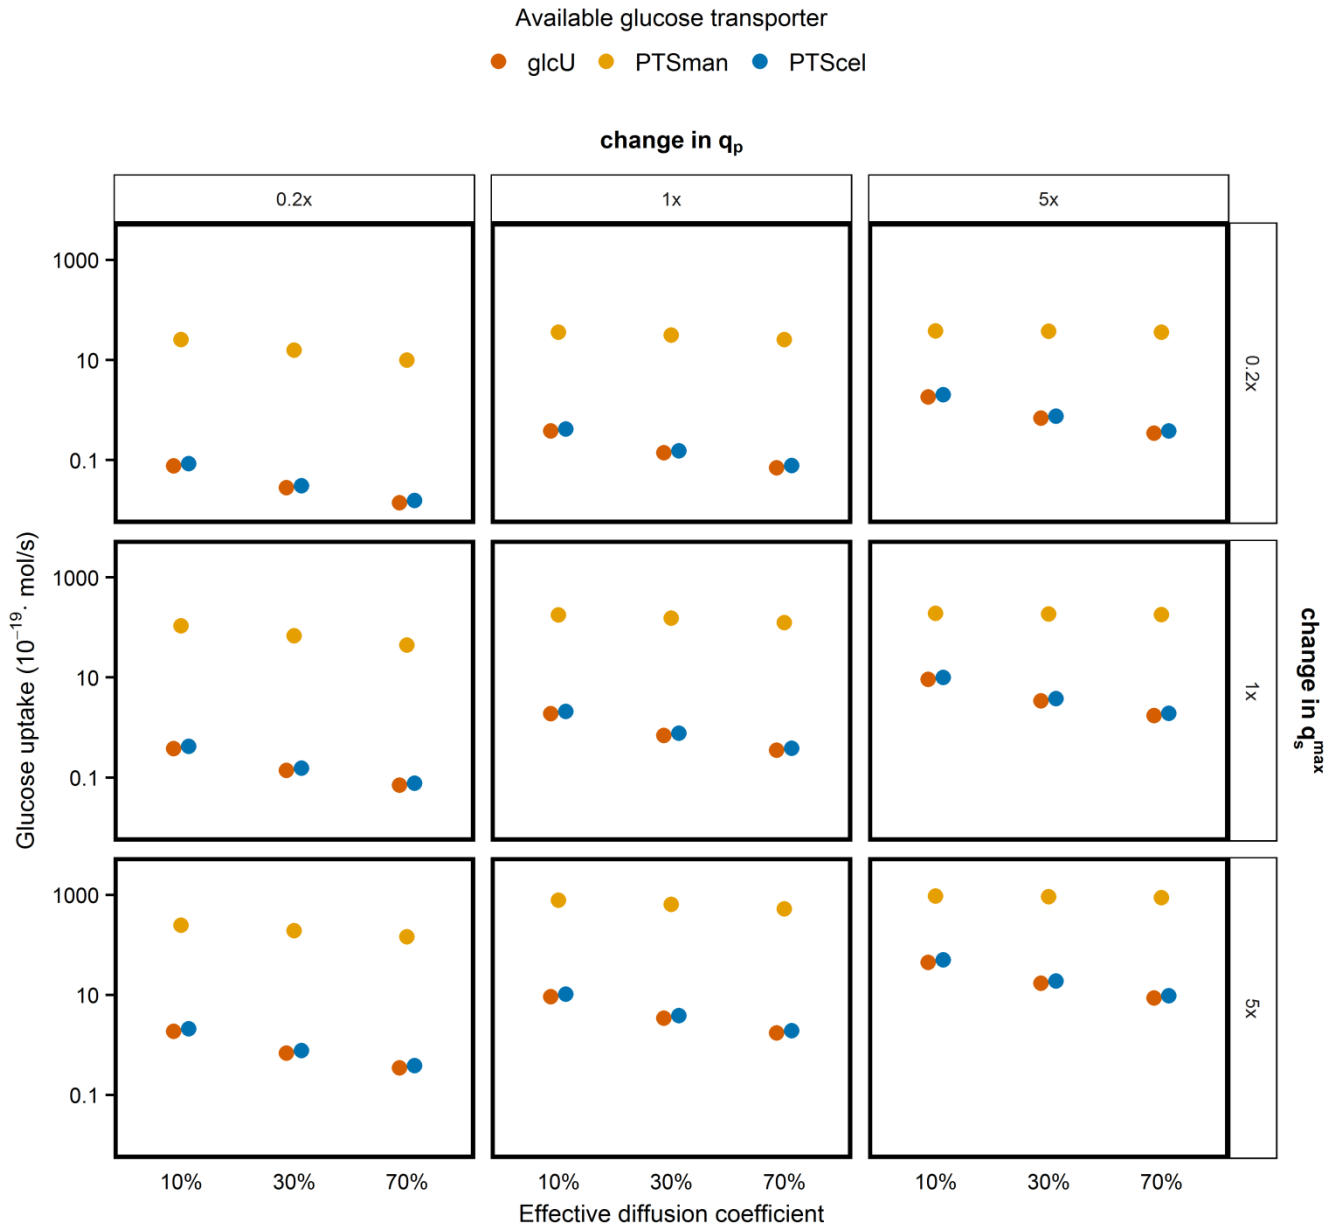

811 **Figure S8: Predicted glucose uptake.** We modelled receiver cells with different glucose affinities  
812 and calculated the predicted glucose uptake. A sensitivity analysis for five-fold changes in  $q_p$  and  $q_s^{\max}$   
813 values was incorporated. Each simulation contained eight receiver cells aggregated with a producer  
814 (Figure S5), this figure shows the combined glucose uptake of these receivers.  
815

816 **Section 5: Growth rate determination**

817 Strains were incubated in CDM + 0.2 wt% glucose in a 96-well plate. The OD<sub>600</sub> was  
818 measured every six minutes for 24 hours using a SPECTRAMax 384 plus plate reader  
819 (Molecular Devices, San Jose, CA, USA). OD<sub>600</sub> measurements were background corrected,  
820 ln-transformed and the slope of the region with exponential growth was calculated as the  
821 growth rate (Table S2).

822

823 **Table S2. Growth rates of receivers with different glucose transporters (n=22).**

| <b>Strain</b>                      | <b>Growth rate ± SD<br/>(h<sup>-1</sup>)</b> |
|------------------------------------|----------------------------------------------|
| <i>L. lactis</i> MG1363_GFP        | 1.25 ± 0.04                                  |
| <i>L. lactis</i> NZ9000_GFP_glcU   | 0.79 ± 0.04                                  |
| <i>L. lactis</i> NZ9000_GFP_PTSman | 0.74 ± 0.11                                  |
| <i>L. lactis</i> NZ9000_GFP_PTScel | 0.57 ± 0.03                                  |

824

825 **Section 6: Flow cytometry data for receivers glucose transporters with different**  
826 **affinities and  $V_{\max}$**

827 We constitutively expressed GFP in three previously constructed *L. lactis* NZ9000 mutants  
828 with a single glucose transporter [27], and analyzed their growth in different spatial  
829 structures. This experiment focused on beads incubated in CDM (allowing glucose diffusion  
830 from beads), as we expected that under these conditions the transporter characteristics of  
831 receivers would be important. Figure S9A shows the experimental results when receivers  
832 were ~15  $\mu\text{m}$  from a producer within the same bead and incubated in CDM, whereas in  
833 Figure S9B the beads were incubated in medium with  $10^9$  glucose-consumers per mL. Figure  
834 S9C shows the experimental results of producer-receiver aggregates, incubated in CDM with  
835  $10^9$  glucose-consumers per mL. Without a competing glucose-consumers we observed  
836 growth of both receivers with and receivers without a producer in their bead (Figure S9A),  
837 while with competing glucose-consumers only producers could grow (Figure S9B). In  
838 producer-receiver aggregates receivers were able to grow, despite the presence of competing  
839 glucose-consumers (Figure S9C). The results were similar for all glucose transporters, and  
840 were consistent with the results of the wild-type (Figure 2, Table 2).

841

842  
843  
844  
845  
846  
847  
848  
849  
850  
851  
852  
853  
854  
855  
856  
857  
858  
859  
860  
861  
862  
863  
864  
865  
866  
867  
868

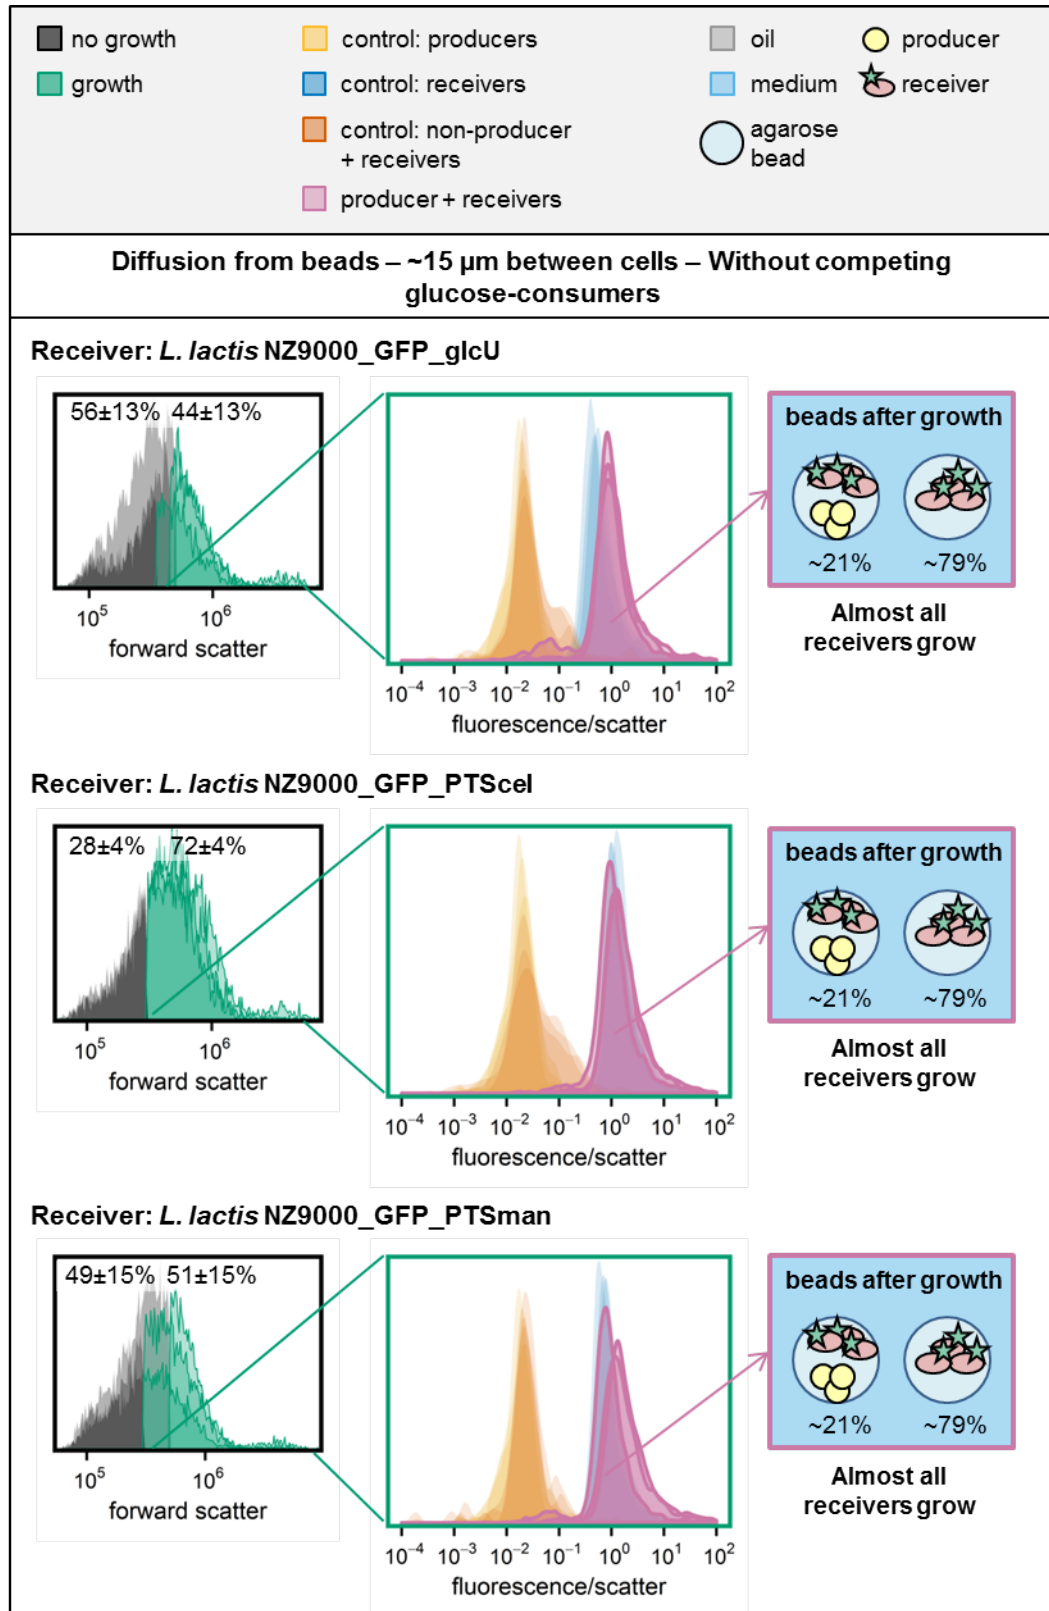

**Figure S9A.** Glucose accumulates, allowing receivers to grow independent of the available glucose transporter. See complete caption on page 24.



869

870

871

872

873

874

875

876

877

878

879

880

881

882

883

884

885

886

887

888

889

890

891

892

893

894

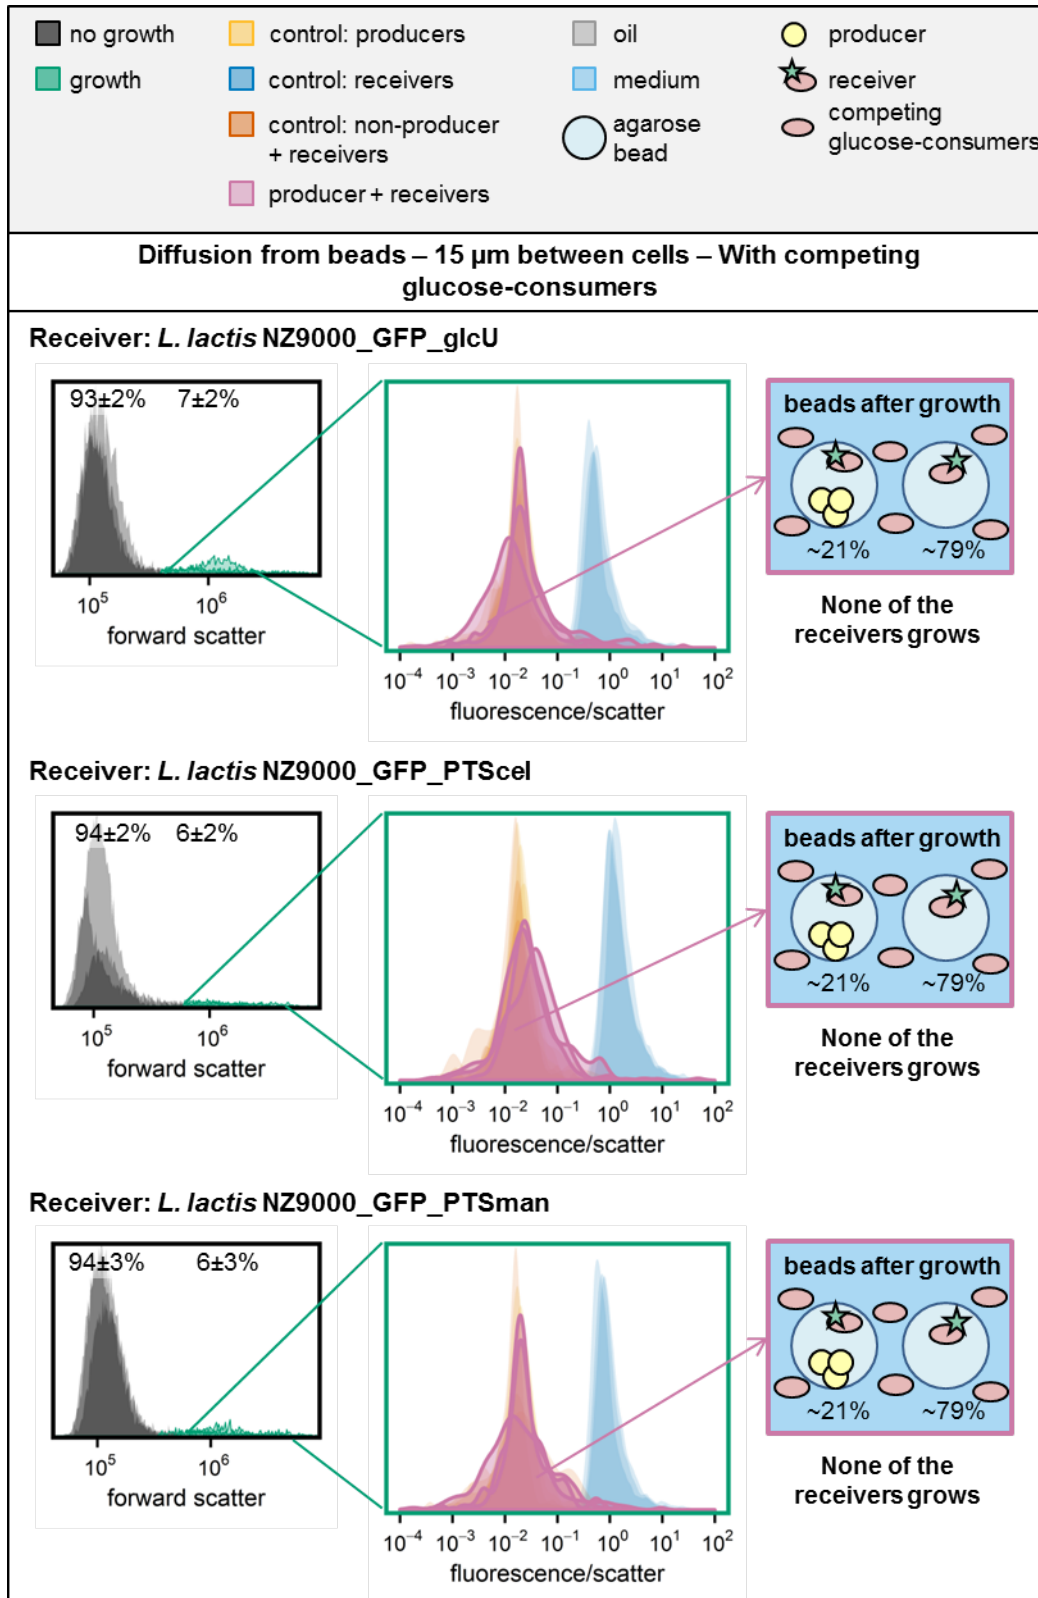

**Figure S9B.** In presence of competing glucose-consumers receivers cannot grow, independent of the available glucose transporter. See complete caption on page 24.

895  
896  
897  
898  
899  
900  
901  
902  
903  
904  
905  
906  
907  
908  
909  
910  
911  
912  
913  
914  
915  
916  
917  
918

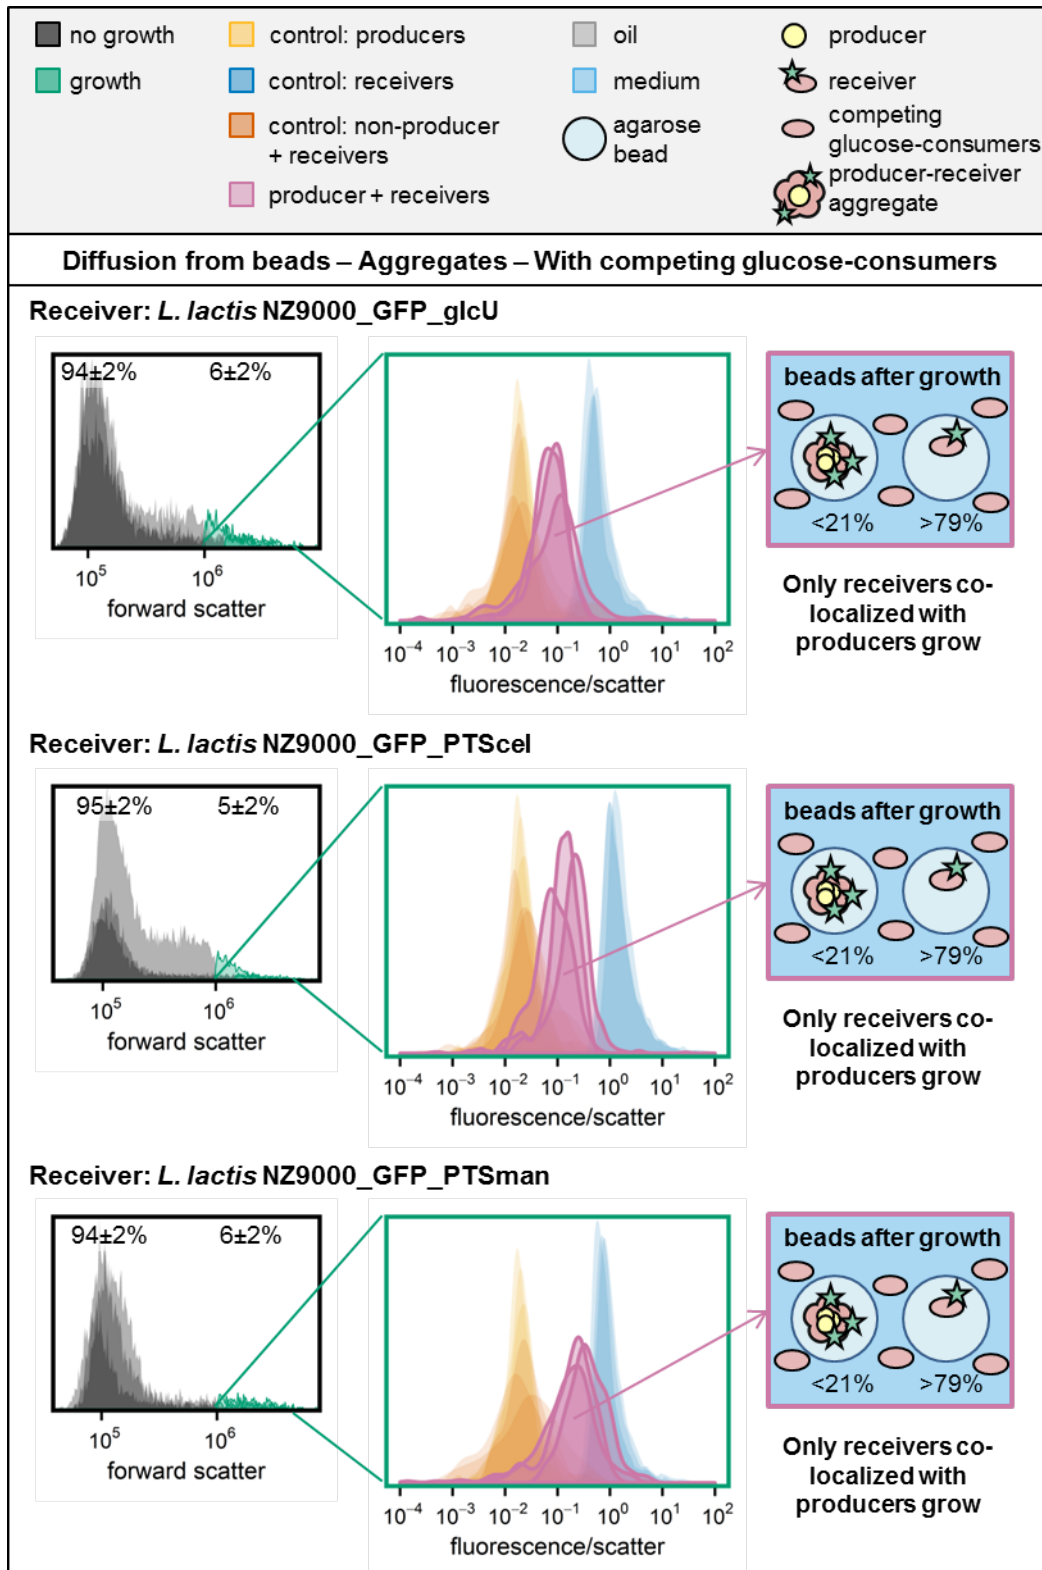

919 **Figure S9C.** Despite the presence of competing glucose-consumers receivers within producer-  
920 receiver aggregates can grow, independently of the available glucose transporter. See complete  
921 caption on page 24.

922 **Figure S9: Response of consortia containing receivers with different glucose affinities.** The  
923 forward scatter histograms show the percentage of beads that were gated as “growth” in the co-culture  
924 of producer and receivers. The fluorescence/scatter histograms show the fluorescence/scatter ratio of  
925 beads that were gated as “growth” (n=3). Next to the co-culture of producer and receivers several  
926 control samples are included: receivers only, producers only and co-cultures of non-producers and  
927 receivers (n=3 for each of them). The non-producers and receivers, and the producers only controls  
928 are overlapping in all plots. The schematic drawing at the right shows the situation after growth, based  
929 on data from the two histograms. **Different panels contain different spatial structures:** (A)  
930 Receivers ~15  $\mu\text{m}$  from a producer within the same bead, incubated in CDM. (B) Receivers ~15  $\mu\text{m}$   
931 from a producer within the same bead, incubated in CDM with  $10^9$  glucose-consumers per mL. (C)  
932 Aggregates of producers and receivers, incubated in beads surrounded by CDM with  $10^9$  glucose-  
933 consumers per mL.  
934

## 935 **References**

- 936 1. Aylward FO, Eppley JM, Smith JM, Chavez FP, Scholin CA, DeLong EF. Microbial  
937 community transcriptional networks are conserved in three domains at ocean basin  
938 scales. *Proc Natl Acad Sci U S A* 2015; **112**: 5443–5448.
- 939 2. Cordero OX, Datta MS. Microbial interactions and community assembly at  
940 microscales. *Curr Opin Microbiol* 2016; **31**: 227–234.
- 941 3. Westhoff S, van Wezel GP, Rozen DE. Distance-dependent danger responses in  
942 bacteria. *Curr Opin Microbiol* 2017; **36**: 95–101.
- 943 4. Song Y, Wang Y, Mao G, Gao G, Wang Y. Impact of planktonic low nucleic acid-  
944 content bacteria to bacterial community structure and associated ecological functions  
945 in a shallow lake. *Sci Total Environ* 2019; **658**: 868–878.
- 946 5. D’Souza G, Shitut S, Preussger D, Yousif G, Waschina S, Kost C. Ecology and  
947 evolution of metabolic cross-feeding interactions in bacteria. *Nat Prod Rep* 2018; **35**:  
948 455–488.
- 949 6. Fuhrman JA, Cram JA, Needham DM. Marine microbial community dynamics and  
950 their ecological interpretation. *Nat Rev Microbiol* 2015; **13**: 133–146.
- 951 7. Sommer F, Anderson JM, Bharti R, Raes J, Rosenstiel P. The resilience of the  
952 intestinal microbiota influences health and disease. *Nat Rev Microbiol* 2017; **15**: 630–  
953 638.
- 954 8. Koschwanez JH, Foster KR, Murray AW. Sucrose utilization in budding yeast as a  
955 model for the origin of undifferentiated multicellularity. *PLoS Biol* 2011; **9**.
- 956 9. Bachmann H, Molenaar D, Kleerebezem M, van Hylckama Vlieg JET. High local  
957 substrate availability stabilizes a cooperative trait. *ISME J* 2011; **5**: 929–932.
- 958 10. Gao M, Zheng H, Ren Y, Lou R, Wu F, Yu W, et al. A crucial role for spatial  
959 distribution in bacterial quorum sensing. *Sci Rep* 2016; **6**.

- 960 11. Chacón J, Möbius W, Harcombe W. The spatial and metabolic basis of colony size  
961 variation. *ISME J* 2018; **12**: 669–680.
- 962 12. Hynes WF, Chacón J, Segrè D, Marx CJ, Cady NC, Harcombe WR. Bioprinting  
963 microbial communities to examine interspecies interactions in time and space. *Biomed*  
964 *Phys Eng Express* 2018; **4**.
- 965 13. Dal Co A, van Vliet S, Kiviet DJ, Schlegel S, Ackermann M. Short-range interactions  
966 govern cellular dynamics in microbial multi-genotype systems. *bioRxiv* 2019; 530584.
- 967 14. Diener C, Schreiber G, Giese W, del Rio G, Schröder A, Klipp E. Yeast mating and  
968 image-based quantification of spatial pattern formation. *PLoS Comput Biol* 2014; **10**.
- 969 15. Dobay A, Bagheri HC, Messina A, Kümmerli R, Rankin DJ. Interaction effects of cell  
970 diffusion, cell density and public goods properties on the evolution of cooperation in  
971 digital microbes. *J Evol Biol* 2014; **27**: 1869–1877.
- 972 16. Kreft J-U. Biofilms promote altruism. *Microbiology* 2004; **150**: 2751–2760.
- 973 17. Harcombe W. Novel cooperation experimentally evolved between species. *Evolution*  
974 *(N Y)* 2010; **64**: 2166–2172.
- 975 18. Harcombe WR, Chacon J, Adamowicz E, Chubiz L, Marx C. Evolution of  
976 bidirectional costly mutualism from byproduct consumption. *PNAS* 2018; **I**: 1–5.
- 977 19. Pande S, Kaftan F, Lang S, Svatoš A, Germerodt S, Kost C. Privatization of  
978 cooperative benefits stabilizes mutualistic cross-feeding interactions in spatially  
979 structured environments. *ISME J* 2016; **10**: 1413–1423.
- 980 20. Marchal M, Goldschmidt F, Derksen-Müller SN, Panke S, Ackermann M, Johnson  
981 DR. A passive mutualistic interaction promotes the evolution of spatial structure  
982 within microbial populations. *BMC Evol Biol* 2017; **17**.
- 983 21. van Tatenhove-Pel RJ, Zwering E, Solopova A, Kuipers OP, Bachmann H. Ampicillin-  
984 treated *Lactococcus lactis* MG1363 populations contain persisters as well as viable but

- 985 non-culturable cells. *Sci Rep* 2019; **9**: 9867.
- 986 22. Castro R, Neves AR, Fonseca LL, Pool WA, Kok J, Kuipers OP, et al.  
987 Characterization of the individual glucose uptake systems of *Lactococcus lactis*:  
988 Mannose-PTS, cellobiose-PTS and the novel GlcU permease. *Mol Microbiol* 2009; **71**:  
989 795–806.
- 990 23. Overkamp W, Beilharz K, Weme RDO, Solopova A, Karsens H, Kovács ÁT, et al.  
991 Benchmarking various green fluorescent protein variants in *Bacillus subtilis*,  
992 *Streptococcus pneumoniae*, and *Lactococcus lactis* for live cell imaging. *Appl Environ*  
993 *Microbiol* 2013; **79**: 6481–6490.
- 994 24. Otto R, ten Brink B, Veldkamp H, Konings WN. The relation between growth rate and  
995 electrochemical proton gradient of *Streptococcus cremoris*. *FEMS Microbiol Lett*  
996 1983; **16**: 69–74.
- 997 25. Wegmann U, O’Connell-Motherway M, Zomer A, Buist G, Shearman C, Canchaya C,  
998 et al. Complete genome sequence of the prototype lactic acid bacterium *Lactococcus*  
999 *lactis* subsp. *cremoris* MG1363. *J Bacteriol* 2007; **189**: 3256–3270.
- 1000 26. van Rooijen RJ, Gasson MJ, De Vos WM. Characterization of the *Lactococcus lactis*  
1001 lactose operon promoter: contribution of flanking sequences and lacR repressor to  
1002 promoter activity. *J Bacteriol* 1992; **174**: 2273–2280.
- 1003 27. Pool WA, Neves AR, Kok J, Santos H, Kuipers OP. Natural sweetening of food  
1004 products by engineering *Lactococcus lactis* for glucose production. *Metab Eng* 2006;  
1005 **8**: 456–464.
- 1006 28. Tarazanova M, Huppertz T, Beerthuyzen M, van Schalkwijk S, Janssen P, Wels M, et  
1007 al. Cell surface properties of *Lactococcus lactis* reveal milk protein binding  
1008 specifically evolved in dairy isolates. *Front Microbiol* 2017; **8**.
- 1009 29. Stewart PS. Diffusion in biofilms. *J Bacteriol* 2003; **185**: 1485–1491.

- 1010 30. Weng L, Liang S, Zhang L, Zhang X, Xu J. Transport of glucose and poly(ethylene  
1011 glycol)s in agarose gels studied by the refractive index method. *Macromolecules* 2005;  
1012 **38**: 5236–5242.
- 1013 31. Lawrence JR, Wolfaardt GM, Korber DR. Determination of diffusion coefficients in  
1014 biofilms by confocal laser microscopy. *Appl Environ Microbiol* 1994; **60**: 1166–1173.
- 1015 32. Klumpp S, Zhang Z, Hwa T. Growth rate-dependent global effects on gene expression  
1016 in bacteria. *Cell* 2009; **139**: 1366–1375.
- 1017 33. Hsu RH, Clark RL, Tan JW, Ahn JC, Gupta S, Romero PA, et al. Microbial interaction  
1018 network inference in microfluidic droplets. *Cell Syst* 2019; **9**: 229–242.
- 1019 34. Nadell CD, Drescher K, Foster KR. Spatial structure, cooperation and competition in  
1020 biofilms. *Nat Rev Microbiol* 2016; **14**: 589–600.
- 1021 35. Kretschmer S, Ganzinger KA, Franquelim HG, Schwille P. Synthetic cell division via  
1022 membrane-transforming molecular assemblies. *BMC Biol* 2019; **17**.
- 1023 36. Leventhal GE, Ackermann M, Schiessl KT. Why microbes secrete molecules to  
1024 modify their environment: the case of iron-chelating siderophores. *J R Soc Interface*  
1025 2019; **16**.
- 1026 37. Gore J, Youk H, van Oudenaarden A. Snowdrift game dynamics and facultative  
1027 cheating in yeast. *Nature* 2009; **459**: 253–256.
- 1028 38. Haitjema CH, Gilmore SP, Henske JK, Solomon K V., de Groot R, Kuo A, et al. A  
1029 parts list for fungal cellulosomes revealed by comparative genomics. *Nat Microbiol*  
1030 2017; **2**.
- 1031 39. Hauert C, Doebeli M. Spatial structure often inhibits the evolution of cooperation in  
1032 the snowdrift game. *Nature* 2004; **428**: 643–646.
- 1033 40. Guélon T, Mathias J-D, Deffuant G. Influence of spatial structure on effective nutrient  
1034 diffusion in bacterial biofilms. *J Biol Phys* 2012; **38**: 573–588.

- 1035 41. De Prisco A, van Valenberg HJF, Fogliano V, Mauriello G. Microencapsulated starter  
1036 culture during yoghurt manufacturing, effect on technological features. *Food*  
1037 *Bioprocess Technol* 2017; **10**: 1767–1777.
- 1038 42. Nan B, Bandaria JN, Guo KY, Fan X, Moghtaderi A, Yildiz A, et al. The polarity of  
1039 myxobacterial gliding is regulated by direct interactions between the gliding motors  
1040 and the Ras homolog MglA. *Proc Natl Acad Sci U S A* 2015; **112**.
- 1041 43. Miettinen TP, Caldez MJ, Kaldis P, Björklund M. Cell size control – a mechanism for  
1042 maintaining fitness and function. *BioEssays* 2017; **39**.
- 1043 44. Pelcé P. Competition of energy between active transport and vesicle fusion at the  
1044 origin of intracellular gradient fields. *J Theor Biol* 2018; **438**: 165–173.
- 1045 45. Folkmann AW, Seydoux G. Single-molecule study reveals the frenetic lives of  
1046 proteins in gradients. *Proc Natl Acad Sci U S A* 2018; **115**: 9336–9338.
- 1047 46. Agarwal SR, Clancy CE, Harvey RD. Mechanisms restricting diffusion of intracellular  
1048 cAMP. *Sci Rep* 2016; **6**.
- 1049 47. Boonmee M, Leksawasdi N, Bridge W, Rogers PL. Batch and continuous culture of  
1050 *Lactococcus lactis* NZ133: experimental data and model development. *Biochem Eng J*  
1051 2003; **14**: 127–135.
- 1052 48. Goel A, Eckhardt TH, Puri P, de Jong A, Branco dos Santos F, Giera M, et al. Protein  
1053 costs do not explain evolution of metabolic strategies and regulation of ribosomal  
1054 content: Does protein investment explain an anaerobic bacterial Crabtree effect? *Mol*  
1055 *Microbiol* 2015; **97**: 77–92.
- 1056 49. Heinzle E, Biwer AP, Cooney CL. Development of sustainable bioprocesses -  
1057 modeling and assessment. 2006. John Wiley & Sons Ltd.
- 1058 50. Oliveira AP, Nielsen J, Förster J. Modeling *Lactococcus lactis* using a genome-scale  
1059 flux model. *BMC Microbiol* 2005; **5**.



- 1060 51. Feijó Delgado F, Cermak N, Hecht VC, Son S, Li Y, Knudsen SM, et al. Intracellular  
1061 water exchange for measuring the dry mass, water mass and changes in chemical  
1062 composition of living cells. *PLoS One* 2013; **8**.  
1063  
1064  
1065
